10           **Running Title:** Both additive and epistatic effects play important roles in the genetic  
11 control of end-use quality traits in wheat

12           **Key Words:** Genetics, Wheat, End-use Quality Traits, High-density Linkage Map,  
13 Quantitative Trait Loci (QTL) Identification; QTL mapping.

14           **Corresponding author: Mohamed Mergoum**

15 Professor, Georgia Seed Development/UGA Foundation Professor

16 Institute of Plant Breeding, Genetics and Genomics. Department of Crop and Soil

17 Sciences, Redding Building #262, 1109 Experiment Street, Griffin, GA 30223-1797.

18 Phone: (770) 228-7289.

19 [mmergoum@uga.edu](mailto:mmergoum@uga.edu)

20

21

22

23

24

25

26

27

28

29 **Abstract**

30 Improving the end-use quality traits is one of the primary objectives in wheat breeding programs.  
31 In the current study, a population of 127 recombinant inbred lines (RILs) derived from a cross  
32 between Glenn (PI-639273) and Traverse (PI-642780) was developed and used to identify  
33 quantitative trait loci (QTL) for 16 end-use quality traits in wheat. The phenotyping of these 16  
34 traits was performed in nine environments in North Dakota, USA. The genotyping for the RIL  
35 population was conducted using the wheat Illumina iSelect 90K SNP assay. A high-density  
36 genetic linkage map consisting of 7,963 SNP markers identified a total of 76 additive QTL (A-  
37 QTL) and 73 digenic epistatic QTL (DE-QTL) associated with these traits. Overall, 12 stable  
38 major A-QTL and three stable DE-QTL were identified for these traits, suggesting that both A-  
39 QTL and DE-QTL played an important role in controlling end-use quality traits in wheat. The  
40 most significant A-QTL (*AQ.MMLPT.ndsu.1B*) was detected on chromosome 1B for mixograph  
41 middle line peak time. The *AQ.MMLPT.ndsu.1B* A-QTL was located very close to the position  
42 of the Glu-B1 gene encoding for a subunit of high molecular weight glutenin and explained up to  
43 24.43% of phenotypic variation for mixograph MID line peak time. A total of 23 co-localized  
44 QTL loci were detected, suggesting the possibility of the simultaneous improvement of the end-  
45 use quality traits through selection procedures in wheat breeding programs. Overall, the  
46 information provided in this study could be used in marker-assisted selection to increase  
47 selection efficiency and to improve the end-use quality in wheat.

48

49

50

51

- 52    **Abbreviations**
- 53    **AACCI** American Association of Cereal Chemists International
- 54    **A-QTL** additive QTL
- 55    **BA** baking absorption
- 56    **BLV** bread loaf volume
- 57    **BLUP** best linear unbiased predictor
- 58    **BMT** bake-mixing time
- 59    **CBCL** crumb color
- 60    **CTCL** crust color
- 61    **cM** centimorgans
- 62    **DArT** diversity arrays technology
- 63    **DE-QTL** digenic epistatic QTL
- 64    **DO** dough character
- 65    **FE** flour extraction
- 66    **FHB** *Fusarium* head blight
- 67    **GPC** grain protein content
- 68    **HMW** high molecular weight
- 69    **HRSW** hard red spring wheat
- 70    **ICIM-ADD** inclusive composite interval mapping with additive effects
- 71    **ICIM-EPI** inclusive composite interval mapping of epistatic QTL
- 72    **LMW** low molecular weight
- 73    **MAS** marker-assisted selection

- 74 **MELS** mixograph envelope left slope
- 75 **MERS** mixograph envelope right slope
- 76 **MMLPI** mixograph MID line peak integral
- 77 **MMLPT** mixograph MID line peak time
- 78 **MMLPV** mixograph MID line peak value
- 79 **MMLPW** mixograph MID line peak width
- 80 **MMLTV** mixograph MID line time \* value
- 81 **MIXOPA** general mixograph pattern
- 82 **NDSU** North Dakota State University
- 83 **NIR** near-infrared reflectance
- 84 **PPM** parts per million
- 85 **PV** phenotypic variation
- 86 **QTL** quantitative trait loci
- 87 **RCBD** randomized complete block design
- 88 **RFLP** restriction fragment length polymorphisms
- 89 **REML** restricted maximum likelihood
- 90 **SSD** single seed descent
- 91 **SKB** Sandstedt, Kneen, and Blish

## 92 **Introduction**

93 Wheat (*Triticum aestivum* L.) produced in the Northern Great Plains of the USA is  
94 known around the world due to its high protein content and outstanding end-use quality traits  
95 (Vachal et al. 2010). In wheat breeding programs, the end-use quality traits are not usually  
96 evaluated until late (starting from primarily yield trials onwards) in the breeding program. This is  
97 because the end-use quality evaluations are expensive and a large amount of grain is needed to  
98 conduct the evaluations. Performing these evaluations at a late stage in the breeding program  
99 often results in ostensibly promising wheat lines with high yield and resistance to diseases that  
100 cannot be released due to poor end-use quality traits, such as a weak performance for milling  
101 parameters and baking properties. To address these challenges, many studies have been  
102 conducted to identify quantitative trait loci (QTL) and associated markers for end-use quality  
103 traits, with the aim to use such markers in marker-assisted selection (MAS) to improve quality  
104 traits in early generations of the breeding program (Campbell et al. 2001; Groos et al. 2003;  
105 Prasad et al. 2003; Breseghello et al. 2005; Kulwal et al. 2005; Arbelbide and Bernardo 2006;  
106 Breseghello and Sorrells 2006; Huang et al. 2006; Kuchel et al. 2006; Kunert et al. 2007; Mann  
107 et al. 2009; Tsilo et al. 2010; Zhao et al. 2010; Carter et al. 2012; Li et al. 2012a; Simons et al.  
108 2012; El-Feki et al. 2013; Mergoum et al. 2013; Deng et al. 2015; Echeverry-Solarte et al. 2015;  
109 Tiwari et al. 2016; Jin et al. 2016). It should be mentioned that MAS for end-use quality traits  
110 would be commenced from F<sub>5</sub> generation onwards if a single seed decent (SSD) method is used  
111 to develop wheat cultivars.

112 Kernel characteristics, grain protein content; flour, dough, milling, and bread baking  
113 characteristics differentiate the end-use quality traits of wheat (*Triticum aestivum* L.) (Souza et

114 al. 2002). These traits are complex traits influenced by a combination of environmental  
115 conditions and genetic factors (Rousset et al. 1992; Peterson et al. 1998). Grain protein content  
116 has received special attention among end-use quality traits because it is an indication of the  
117 quality performance of wheat products such as bread, cake, noodles, and pasta (Zhao et al. 2010).  
118 Moreover, wheat markets are determined based on the amount of protein in the grain (Regional  
119 Quality Report 2011). Several studies reported the existence of genes associated with grain  
120 protein content across all wheat chromosomes (Galante et al. 2001; Gross et al. 2003; Prasad et  
121 al. 2003; Kulwal et al. 2005; Huang et al. 2006; Kunert et al. 2007; Mann et al. 2009; Tsilo et al.  
122 2010; Zhao et al. 2010; Li et al. 2012a and b; Carter et al. 2012). Recently, Tiwari et al. (2016)  
123 reported a major QTL on chromosome 1A associated with grain protein content that account for  
124 16.2 to 17.7% of the PV across environments using a doubled-haploid population comprised of  
125 138 segregants from a cross between Berkut and Krichauff cultivars. In another study, Boehm et  
126 al. (2017) identified three major QTL for grain protein content on chromosomes 1A, 7B, and 7B  
127 using 132 F6:8 recombinant inbred lines (RILs) population derived from a cross between  
128 Butte86 and ND2603. In some of these studies, molecular markers associated with genes  
129 regulating gluten proteins have also been reported. Gluten is the coherent mass formed when  
130 glutenin and gliadin (storage protein) bind after water is added to flour (Stone and Savin 1999).  
131 Glutenins are responsible for dough strength and are composed by subunits of high molecular  
132 weight (HMW) and subunits of low molecular weight (LMW). The major genes controlling  
133 HMW Glutenins are Glu-1, Glu-A1, Glu-B1, and Glu-D1, whereas the major genes controlling  
134 LMW Glutenins are Glu-A3, Glu-B3, and Glu-D3 (Payne 1987).

135           Mixograph-related properties determine the performance of wheat flour dough during  
136 mechanical treatment (Alamri 2009a, b). Mann et al. (2009) reported major dough rheology QTL  
137 associated with the Glu-B1 and Glu-D1 loci in a double haploid population derived from a cross  
138 of Kukri × Jans. The same study also identified a major QTL for unextractable polymeric protein  
139 (UPP). Unextractable polymeric protein were located on chromosomes 1B and 2B and were  
140 suggested as a predictor of dough strength (Gras et al. 2001). Mann et al. (2009) also showed  
141 time to peak dough development (TPDD) was associated with the Glu-B1, Glu-B3, and Glu-D1  
142 loci, while peak resistance (PR) was influenced by two QTL detected on chromosome 1A.  
143 Several studies have shown the existence of genes associated with flour extraction across all  
144 wheat chromosomes except chromosome 1D (Kunert et al. 2007; Tsilo et al. 2011; Simons et al.  
145 2012). Campbell et al. (2001) reported several QTL on chromosomes 1B, 3B, 5A, 5B, 5D in a  
146 population consisted of 78 F<sub>2.5</sub> RILs derived from the NY18/CC cross using 370 molecular  
147 markers to create a genetic linkage map including restriction fragment length polymorphisms  
148 (RFLP), microsatellites, and markers derived from known function genes in wheat. In another  
149 study, Echeverry-Solarte et al. (2015) identified four stable QTL on chromosomes 1A, 1B, 3D,  
150 and 6A for flour extraction in a RIL population derived from a crossing between an elite wheat  
151 line (WCB414) and an exotic genotype with supernumerary spikelet. In this study, 939 Diversity  
152 Arrays Technology (DArT) markers were used to assemble 38 genetic linkage groups covering  
153 3,114.2 cM with an average distance of 4.6 cM between two markers.

154           Kuchel et al. (2006) identified a major QTL for dough development time on chromosome  
155 1A and several QTL for dough stability time on chromosomes 1A and 1B using two advanced  
156 backcross populations named as B22 (Batis × Syn022) and Z86 (Zentos × Syn086). The same



157 study identified QTL for water absorption on chromosomes 1A and 2D (Kuchel et al. 2006).  
158 Recently, a major QTL for water absorption was detected on the short arm of chromosome 5D  
159 using compositions of 390 landraces and 225 released varieties from the wheat germplasm bank  
160 of Shandong Academy of Agricultural Science (Li et al. 2009). In another study, Li et al. (2009)  
161 detected a major QTL for water absorption associated with the puroindoline loci on the short arm  
162 of chromosome 5D. Further Li et al. (2012) identified a main effect QTL for water absorption on  
163 chromosome 5B in two populations derived from crosses among three Chinese wheat cultivars:  
164 Weimai8, Jimai20, and Yannong19. Arbelbide and Bernardo (2006) identified four QTL for  
165 dough strength on chromosomes 1A, 1B, 1D, and 5B using 80 parental and 373 advanced  
166 breeding lines.

167         Limited information appears to be available on the genetic control of baking properties.  
168 Mann et al. (2009) found a QTL associated with sponge and dough baking on chromosome 5D in  
169 a population of doubled haploid lines derived from a cross between two Australian cultivars  
170 Kukri and Janz. In another study, Zanetti et al. (2001) detected 10 QTL for dough strength on  
171 chromosomes 1B, 5A, 5B, and 5D. Kunert et al. (2007) reported two major QTL for loaf volume  
172 trait in the BC<sub>2</sub>F<sub>3</sub> population of B22 (Batis × Syn022). Simons et al. (2012) identified a QTL on  
173 the long arm of chromosome 1D for bake-mixing time and water absorption traits in a population  
174 derived from a cross between BR34 × Grandin. In the same study, Simons et al. (2012) found no  
175 significant QTL for flour brightness and bake-mixing water absorption, suggesting that these  
176 characteristics may be controlled by small effect QTL.

177         Although several studies were conducted in the past to dissect the genetics of wheat end-  
178 use quality traits, almost all of these studies were based on low-density genetic linkage maps

179 containing only several hundred molecular markers. Recently, Boehm et al. (2017) conducted a  
180 high-density genetic linkage map study that identified 79 QTL associated with end-use quality  
181 traits in a wheat RIL population derived from a cross between Butte86 and ND2603 using 607  
182 genotyping-by-sequencing SNP markers, 81 microsatellite markers, and seven HMW and LMW  
183 markers. In this study, a total of 35 linkage groups were also assembled with a total map size of  
184 1813.4 cM, an average genetic distance of 2.9 cM between any two markers, and coverage on all  
185 wheat chromosomes except chromosome 4D. In another study, Jin et al. 2016 performed a high-  
186 density linkage map study to detect 119 additive QTL associated with milling quality traits in a  
187 RIL population derived from a cross between Gaocheng 8901 and Zhoumai 16. In this study, a  
188 total of 46,961 SNP markers based on the wheat Illumina 90K and 660K iSelect SNP assays  
189 were used to construct a linkage map with the average density of 0.09 cM per marker.

190 A low-density genetic linkage map limits the successful application of associated markers  
191 in breeding programs. In the current study, the wheat Illumina 90K iSelect assay (Wang et al.  
192 2014) was used to detect marker-trait associations for end-use quality traits in wheat. Kumar et  
193 al. (2016) reported using the wheat Illumina 90K iSelect assay to create a genetic linkage map,  
194 indicating that it had a much higher resolution compared to most of the previous genetic linkage  
195 maps for the dissection of grain shape and size traits. Thus, the aims of this study were to: (1)  
196 construct a high-density linkage map using the wheat Illumina 90K iSelect assay, (2) provide  
197 comprehensive insight into the genetic control of end-use quality traits, and (3) identify SNP  
198 markers closely linked to QTL associated with end-use quality traits to enhance molecular  
199 breeding strategies.

## 200 **Material and Methods**

201 **Plant materials**

202 A population of 127 RILs derived from a cross between Glenn (PI-639273; Mergoum et  
203 al. 2006) and Traverse (PI-642780; Karl 2006; [https://www.sdstate.edu/sites/default/files/2017-](https://www.sdstate.edu/sites/default/files/2017-01/B749.pdf)  
204 [01/B749.pdf](https://www.sdstate.edu/sites/default/files/2017-01/B749.pdf)) was used in this study. Glenn and Traverse are both hard red spring wheat  
205 (HRSW) cultivars. Glenn was developed and released in 2005 by the Hard Red Spring Wheat  
206 Breeding Program at North Dakota State University (NDSU) in Fargo, ND, USA. It is well-  
207 known in domestic and export markets due to its high level of resistance to Fusarium head blight  
208 (FHB), high grain protein content, and excellent end-use quality characteristics  
209 (<http://www.ndwheat.com/uploads/resources/1026/hrs18jb.pdf>). Traverse was developed and  
210 released by the South Dakota Agricultural Experiment Station in 2006. It is a high yielding,  
211 FHB-tolerant cultivar with marginal grain protein content and end-use quality. The RIL  
212 population was advanced by single seed descent (SSD) method from the F2 through F10  
213 generations.

214 **Field Experiment Design**

215 The RILs, parental lines, and check varieties were grown under field conditions at three  
216 locations in ND for three years from 2012 to 2014 (Table 1). In 2012, the three sites were  
217 Prosper, Carrington, and Casselton; whereas in 2013 and 2014 the Casselton site was replaced  
218 with the Minot site. A detailed description of the environments is given in Table 1. In 2012, lines  
219 were grown in a randomized complete block design (RCBD) with two replicates; however, in  
220 2013 and 2014, a  $12 \times 12$  partially balanced square lattice design with two replicates (simple  
221 lattice design) was used to reduce experimental error and increase the experiment precision. In  
222 2012 and 2013, each plot was 2.44 m long and 1.22 m wide; whereas in 2014 the plots were 2.44

223 m long and 1.42 m wide. All plots consisted of seven rows. Sowing rate was 113 kg ha<sup>-1</sup> in all  
224 environments.

### 225 **Phenotypic Data Collection**

226 The grain samples harvested from the field experiments were cleaned in two steps before  
227 evaluating quality traits. First, the samples were cleaned using a clipper grain cleaner machine.  
228 Second, the samples were cleaned using a carter dockage tester machine. One replicate was used  
229 to create a 200-g grain sample per line in each location for evaluating 16 end-use quality  
230 characteristics. Quality characteristics analyzed in this study were: grain protein content, flour  
231 extraction, eight mixograph-related parameters, and six baking-related properties.

232 Grain protein content (%) was measured based on 12% moisture using the Near-Infrared  
233 Reflectance (NIR) method for protein determination in small grains and following the American  
234 Association of Cereal Chemists International (AACCI)-approved method 39-10-01 (AACC  
235 International Method 1999). Flour extraction (%) was determined using 150 g of thoroughly  
236 cleaned wheat grain per sample tempered to 16.0% moisture, using the Brabender Quadrumat Jr.  
237 Mill and following the AACCI-approved method 26-50-01 (AACC International Method 1999).

238 Mixograph parameters include the mixograph envelope left slope, mixograph envelope  
239 right slope, mixograph MID line peak time, mixograph MID line peak value, mixograph MID  
240 line time \* value, mixograph MID line peak width, mixograph MID line peak integral, and  
241 general mixograph pattern. Mixograph measurements were obtained from 10 g of flour per  
242 sample on a 14% moisture basis using the National Manufacturing Mixograph (National  
243 Manufacturing, TMCO Division, Lincoln, NE) and following the AACCI-approved method 54-  
244 40-02 (AACC International Method, 1999). Mixsmart software was used to collect data of

245 mixograph envelope left slope (%/min), mixograph envelope right slope (%/min), mixograph  
246 MID line peak time (min), mixograph MID line peak value (%), mixograph MID line peak width  
247 (%), mixograph MID line peak integral (%/min), and mixograph MID line time \* value (%).  
248 The general mixograph pattern was based on a 0 to 9 scale (0 = weakest and 9 = strongest)  
249 according to USDA/ARS–Western Wheat Quality Laboratory mixogram reference chart  
250 (<http://wwql.wsu.edu/wp-content/uploads/2017/03/Appendix-6-Mixogram-Chart.pdf>).

251 Baking properties include bake-mixing time, baking absorption, dough character, bread  
252 loaf volume, crumb color and crust color, Baking parameters were determined from 100 g of  
253 flour per sample on a 14% moisture basis according to the AACCI-approved method 10-09-01  
254 with a little modification in baking ingredients (AACC International Method 1999). The baking  
255 ingredients were modified as follows: (1) malt dry powder was replaced with fungal amylase (15  
256 SKB); (2) compressed yeast was replaced with instant dry yeast; (3) ammonium phosphate was  
257 increased from 0.1 to 5 ppm; (4) two percent shortening was added. Bake mixing time (minutes)  
258 was determined as time to full dough development. Baking absorption was evaluated as a percent  
259 of flour weight on a 14% moisture basis for the amount of water required for optimum dough  
260 baking performance. Dough character was assessed for handling conversion at panning based on  
261 a scale of 1 to 10, with higher scores preferred. Bread loaf volume (cubic centimeters) was  
262 measured by rapeseed (*Brassica napus* L.) displacement 30 minutes after the bread was removed  
263 from the oven. Crumb color and crust color were valued according to visual comparison with a  
264 standard by using a constant illumination source based on a 1 to 10 scale, with higher scores  
265 preferred.

## 266 **Phenotypic Data Analysis**

267 Because the evaluations of end-use quality are expensive and a large amount of grain is  
268 needed, seeds from the two replicates of each environment was bulked and used to analyze  
269 phenotypic data. The experimental design employed was a randomized complete block design  
270 (RCBD). End-use quality traits analyzed were generated from a bulk sample combining two  
271 replicates in each environment, thus data from each environment was considered as a replicate.  
272 Variance components were estimated using restricted maximum likelihood (REML) in the  
273 MIXED procedure of SAS software Version 9.3 (SAS Institute, Inc., Cary, NC, USA). Blocks  
274 (environments) and genotypes were considered random effects. Best linear unbiased predictor  
275 (BLUP) values were estimated using the solution option of the random statement of the Proc  
276 Mixed procedure in SAS. Broad-sense heritability and genetic correlations were calculated using  
277 the Proc Mixed procedure in SAS (Holland et al., 2003; Holland et al., 2006). Broad-sense  
278 heritability was estimated as  $H^2 = \frac{\hat{\sigma}_G^2}{(\frac{\hat{\sigma}_e^2}{r} + \frac{\hat{\sigma}_{GE}^2}{e} + \hat{\sigma}_G^2)}$ , where  $\hat{\sigma}_G^2$  is the estimate of genotypic variance,  
279  $\hat{\sigma}_{GE}^2$  is the estimate of genotype  $\times$  environment interaction variance,  $\hat{\sigma}_e^2$  is the estimate of error  
280 variance,  $r$  is the number of replications per environment, and  $e$  is the number of environments.  
281 It should be mentioned that, in this study  $r = 1$  for the end-use quality traits evaluated on bulked  
282 samples. Broad-sense heritability coefficients were classified according to Hallauer and Miranda  
283 (1988): VH = very high =  $H^2 > 0.70$ , HI = high =  $0.50 < H^2 < 0.70$ , M = medium =  $0.30 < H^2 <$   
284  $0.50$ , and L = low =  $H^2 < 0.30$ . Pearson correlations between quality traits were evaluated using  
285 BLUP values across all environments. The CORR procedure in SAS was used to calculate  
286 Pearson correlations. Trait values collected from the first replicate of each environment and  
287 BLUP values were used for the QTL mapping analysis.

## 288 **Genotyping and Genetic Linkage Map Construction**

289 Lyophilized young leaves were used to isolate genomic DNA for RILs and parental lines  
290 following a modified Doyle and Doyle (1987) protocol described by Diversity Arrays  
291 Technology Pty., Ltd. ([https://ordering.diversityarrays.com/files/DArT\\_DNA\\_isolation.pdf](https://ordering.diversityarrays.com/files/DArT_DNA_isolation.pdf)).  
292 DNA quality was checked via visual observation on 0.8% agarose gel. DNA concentrations were  
293 determined with a NanoDrop 1000 spectrophotometer (NanoDrop Technologies, Inc.,  
294 Wilmington, DE, USA). DNA samples were diluted to the concentration of 50 ng/ $\mu$ l, and 20  $\mu$ l  
295 of the diluted samples were sent to the USDA Small Grains Genotyping Lab in Fargo, ND, for  
296 SNP analysis using the wheat Illumina 90K iSelect SNP assay (Wang et al. 2014). SNP markers  
297 were called as described by Wang et al. (2014) using Genome Studio Polyploid Clustering  
298 Module v1.0 software ([www.illumina.com](http://www.illumina.com)).

299 Out of a total 81,587 SNP markers from the wheat Illumina 90K iSelect assay (Wang et  
300 al. 2014), 8,553 polymorphic SNP markers between parents after excluding poor quality markers  
301 were identified. Markers with a high number of missing values ( $\geq 15\%$ ), inconsistent results in  
302 three replicates of each parental genotype, or significant segregation distortion ( $\chi^2$  goodness-of-  
303 fit statistic,  $p < 0.001$ ) were excluded from the following map construction. Linkage analysis for  
304 8,553 SNP markers was performed using a combination of MAPMARKER/EXP software  
305 version 3.0 (Lander et al., 1989) and MSTmap software (Wu et al., 2008). In the first step, a  
306 high-density SNP consensus map was used (Wang et al., 2014) as a reference to select 210  
307 anchor SNP markers for all 21 wheat chromosomes. For each chromosome, 10 SNP markers that  
308 covered the whole length of each chromosome were selected. By using MAPMARKER/EXP  
309 software version 3.0 (Lander et al. 1987) and the 210 anchor SNP markers, 7,963 out of 8,553

310 SNP markers were placed into the 21 wheat chromosomes based on a minimum LOD score of  
311 5.0 and a maximum distance of 40 centimorgans (cM). In the second step, the marker orders and  
312 genetic distances of each linkage group were estimated using MSTmap software (Wu et al.  
313 2008), with a cut-off at  $p < 0.000001$ , the maximum distance of 15 cM between markers,  
314 grouping LOD criteria of 5.0, and a minimum linkage group size of 2 cM. Genetic distances  
315 between markers were calculated using Kosambi's genetic mapping function (Kosambi 1944).  
316 To check the accuracy of the marker orders, the genetic linkage groups were compared by  
317 inspection with the high-density SNP consensus map of Wang et al. (2014). The final genetic  
318 linkage maps and corresponding graphs were drawn using Mapchart software version 2.2  
319 program (Voorrips 2002).

### 320 **Quantitative Trait Loci Mapping**

321 Inclusive composite interval mapping with additive effects (ICIM-ADD) was  
322 implemented to identify additive QTL (A-QTL) for each trait within each of the nine  
323 environments, as well as across all environments, using QTL IciMapping software version 4.1  
324 (Wang et al. 2012). In QTL IciMapping, stepwise regression ( $p < 0.001$ ) with simultaneous  
325 consideration of all marker information was used. The step size chosen for all A-QTL was kept  
326 at the default value, 1.0 cM. Left and right confidence intervals were calculated by one-LOD  
327 drop off from the estimated A-QTL (Wang et al. 2016). The LOD threshold values to detect  
328 significant A-QTL were calculated by performing a permutation test with a set of 1,000  
329 iterations at a Type I error of 0.05; all A-QTL identified above the LOD threshold value were  
330 reported in this study. In addition, those A-QTL detected in more than two environments or  
331 associated with at least two traits were reported. Furthermore, an A-QTL with an average LOD



332 value above the LOD threshold value and an average phenotypic variation (PV) contribution  
333 over 10% was considered a major A-QTL. Moreover, A-QTL which were identified in at least  
334 three environments were defined as stable QTL.

335 Inclusive composite interval mapping of epistatic QTL (ICIM-EPI) method, available in  
336 QTL IciMapping software version 4.1 (Wang et al. 2012), was employed to identify additive-by-  
337 additive epistatic interactions or digenic epistatic QTL (DE-QTL) for each of the end-use quality  
338 characteristics within each environment, as well as across all environments. For the convenience  
339 of illustration, the digenic epistatic QTL were named as DE-QTL. The step size chosen for DE-  
340 QTL was 5.0 cM. The probability used in stepwise regression for DE-QTL was 0.0001. To  
341 detect DE-QTL, the LOD threshold values were kept at the default value of 5.0. Additionally, the  
342 LOD value of 3.0 was also used as another threshold to declare the presence of a putative DE-  
343 QTL. Those DE-QTL that were identified in at least two environments were reported in this  
344 study. Furthermore, a DE-QTL detected in at least three environments was defined as a stable  
345 DE-QTL. It should be noted that in order to represent the most relevant data, only the highest  
346 values observed across environments for LOD score, additive effect, epistatic effect, and PV  
347 were reported in this study.

#### 348 **Data Availability**

349 Supplemental material is available online at  
350 <https://figshare.com/s/7cea3895f1b90dfe106b>. There are two files (Excel files) in Supplemental  
351 Material, File S1 and File S2. File S1 contains three supplementary tables. Supplementary Table  
352 1 includes complete genetic maps developed using Glenn \* Traverse RIL population.  
353 Supplementary Table 2 shows information related to the complete list of additive QTL (A-QTL)

354 detected for end-use quality traits in a wheat (*Triticum aestivum* L.) RIL population derived from  
355 a cross between Glenn (PI-639273) and Traverse (PI-642780). Supplementary Table 3 shows the  
356 complete list of digenic epistatic QTL (DE-QTL) detected for end-use quality traits in a wheat  
357 (*Triticum aestivum* L.) RIL population derived from a cross between Glenn and Traverse. File S2  
358 contains genotyping data, linkage groups, and phenotyping data.

## 359 **Results**

### 360 **Phenotypic Variation, Heritability, and Genetic and Pearson Correlations**

361 The RIL population showed variation for all end-use quality characteristics studied  
362 (Figure 1; Table 2 and Supplementary Material File S2). The parental lines showed significantly  
363 different values for grain protein content, bake-mixing time, baking absorption, bread loaf  
364 volume, general mixograph pattern, mixograph envelope left slope, mixograph MID line peak  
365 time, mixograph MID line time \* value, mixograph MID line peak width , and mixograph MID  
366 line peak integral. The values differed slightly but not significantly for crumb color, crust color,  
367 flour extraction, mixograph envelope right slope, mixograph MID line peak value, and dough  
368 character across all environments (Table 2). All traits showed approximately normal distributions  
369 (Figure 1), demonstrating the complex (polygenic) nature and quantitative inheritance of these  
370 traits (Fatokun et al. 1992). Transgressive segregation in both directions was observed for grain  
371 protein content, baking absorption, bread loaf volume, crumb color, flour extraction, mixograph  
372 envelope left slope, mixograph envelope right slope, mixograph MID line peak time, and  
373 mixograph MID line peak value across all environments, indicating positive alleles were present  
374 in both parents. Transgressive segregation for crust color, mixograph MID line time \* value, and

375 dough character was observed in the direction of the better parent (Glenn cultivar); several RILs  
376 showed better performance than Glenn cultivar for these traits. For flour extraction and  
377 mixograph envelope left slope, transgressive segregation in the direction of Traverse was  
378 observed, with several RILs showing higher values than the Traverse cultivar for these  
379 characteristics (Table 2).

380 The broad-sense heritability coefficients varied substantially for different traits. The  
381 highest estimated broad-sense heritability was for mixograph MID line peak time (0.77), and the  
382 lowest for crust color (0.05) (Table 2). Among baking properties, bake-mixing time and baking  
383 absorption showed high and moderate broad-sense heritability (0.65 and 0.40, respectively);  
384 while bread loaf volume, crumb color, crust color, and dough character showed low broad-sense  
385 heritability (0.26, 0.11, 0.05, and 0.22, respectively). Among milling and mixograph traits, flour  
386 extraction, general mixograph pattern, mixograph envelope left slope, mixograph envelope right  
387 slope, mixograph MID line peak time, mixograph MID line peak value, mixograph MID line  
388 time \* value, and mixograph MID line peak integral showed moderate to high broad-sense  
389 heritability (0.55, 0.42, 0.38, 0.50, 0.77, 0.31, 0.41, and 0.43, respectively), but mixograph MID  
390 line peak width had low broad-sense heritability (0.23). High to very high broad-sense  
391 heritability coefficients for bake-mixing time, flour extraction, mixograph MID line peak time,  
392 and mixograph MID line peak value indicated stability of these traits, and the PV of these  
393 characteristics was mainly due to genetic effects (Table 2).

394 The genetic and Pearson correlation analyses showed most of the quality traits were  
395 associated with each other (Table 3). Highly positive significant genetic and phenotypic  
396 correlations (correlation coefficient value lies between + 0.50 and + 0.97) were observed

397 between grain protein content and bread loaf volume; grain protein content and envelope left  
398 slope; grain protein content and mixograph MID line peak value; bake-mixing time and general  
399 mixograph pattern; bake-mixing time and mixograph envelope right slope; bake-mixing time and  
400 mixograph MID line peak time; bake-mixing time and mixograph MID line peak integral; baking  
401 absorption and mixograph MID line peak value; bread loaf volume and mixograph envelope left  
402 slope; general mixograph pattern and mixograph MID line time \* value; general mixograph  
403 pattern and mixograph MID line peak width; general mixograph pattern and mixograph MID line  
404 peak integral; mixograph envelope right slope and mixograph MID line peak time; mixograph  
405 MID line peak time and mixograph MID line peak integral; and mixograph MID line peak  
406 integral; mixograph MID line time \* value and mixograph MID line peak width; and mixograph  
407 MID line time \* value and mixograph MID line peak integral. In contrast, high negative  
408 significant genetic and phenotypic correlations (correlation coefficient value lies between - 0.50  
409 and - 0.87) were found between bake-mixing time and mixograph envelope left slope;  
410 mixograph envelope left slope and mixograph MID line peak time; and mixograph envelope  
411 right slope and mixograph MID line peak value. Moderate positive significant genetic and  
412 phenotypic correlations, where correlation coefficient value lies between + 0.30 and + 0.50 and  
413 is significant at  $P < 0.01$ , were identified between grain protein content and mixograph MID line  
414 time \* value; grain protein content and mixograph MID line peak width; bake-mixing time and  
415 mixograph MID line time \* value; bake-mixing time and mixograph MID line peak width;  
416 baking absorption and mixograph envelope left slope; bread loaf volume and crust color; NLV  
417 and general mixograph pattern; bread loaf volume and mixograph MID line peak value; crust  
418 color and general mixograph pattern ; crust color and mixograph MID line peak value; crust

419 color and mixograph MID line time \* value; crust color and mixograph MID line peak width ;  
420 general mixograph pattern and mixograph MID line peak time; general mixograph pattern and  
421 mixograph MID line peak value; mixograph envelope right slope and mixograph MID line peak  
422 integral ; mixograph MID line peak time and mixograph MID line time \* value; and mixograph  
423 MID line peak width and mixograph MID line peak integral. However, moderate negative but  
424 highly significant genetic and phenotypic correlations (correlation coefficient value lies between  
425 - 0.30 and - 0.50) were detected between grain protein content and mixograph envelope right  
426 slope; grain protein content and mixograph MID line peak time; bake-mixing time and  
427 mixograph envelope left slope; baking absorption and mixograph MID line peak time;  
428 mixograph MID line peak time and mixograph MID line peak value. In other pairs of traits  
429 genetic and phenotypic correlations were either low or not statistically significant at  $P < 0.05$ .  
430 Correlations between the end-use quality traits are shown in more detail in Table 3. Differences  
431 between genetic and phenotypic correlation coefficients (Table 3) could be due to low  
432 heritability values; Hill and Thompson (1978) suggested higher heritability values could result in  
433 the accuracy of genetic correlation estimates and greater similarity of genetic and phenotypic  
434 correlation coefficients. The overall level of genetic correlation was greater than phenotypic  
435 correlation, but the magnitude and pattern of genetic and phenotypic correlations were similar,  
436 suggesting phenotypic correlations would likely be fair estimates of their genetic correlations in  
437 end-use quality traits (Table 3).

#### 438 **Genetic Linkage Map**

439 Out of a total of 8,553 SNP markers, 7,963 markers were selected for genetic linkage  
440 mapping according to criteria described in the materials and methods section (Supplementary

441 Material File S2). These markers were mapped onto 41 linkage groups covering all 21 wheat  
442 chromosomes (Table 4 and Supplementary Material File S1 and File S2). The linkage maps  
443 covered a total genetic length of 2,644.82 cM, with an average distance of 0.33 cM between any  
444 two markers (Table 4 and Supplementary Material File S1). The linkage map consisted of 1,427  
445 unique loci (~18%), with an average genetic distance of 1.85 cM between any two unique loci.  
446 Altogether, the B-genome contained considerably more markers (4,807) than the A-genome  
447 (2,549); notably fewer markers were mapped on the D-genome (607). The number of markers on  
448 individual linkage groups varied from 10 (1B2) to 770 (3B1). Furthermore, the number of unique  
449 loci in a linkage group ranged from 2 (3D1) to 113 (7A1) (Table 4). The map position of each  
450 chromosome of Glenn/Traverse map was compared with the high-density SNP consensus map of  
451 Wang et al. (2014). The results showed that the marker orders were fairly consistent with the  
452 average Spearman's rank-order correlation coefficient of 0.83.

#### 453 **Quantitative Trait Loci Analysis**

454 A total of 76 A-QTL and 73 DE-QTL were identified for the 16 end-use quality traits  
455 evaluated in this study (Table 5; Table 6 and Supplementary Material File S1). These A-QTL  
456 and DE-QTL were distributed across all wheat chromosomes except chromosomes 3D and 6A  
457 for A-QTL, and 3D for DE-QTL. In terms of the genome-wide distribution of QTL, the B-  
458 genome had the highest number of A-QTL (36), while the A-genome had the most DE-QTL  
459 (46). This was followed by the A-genome with 25 A-QTL, the D-genome with 15 A-QTL, the B-  
460 genome with 23 DE-, and the D-genome with four DE-QTL (Table 5 and Table 6). All of the A-  
461 QTL and DE-QTL were identified in at least two environments and/or were associated with at  
462 least two different end-use quality traits (Table 5 and Table 6). Out of the 76 A-QTL, a total of

463 43 A-QTL (~57%) explained more than 10% of PV and were considered major A-QTL, while  
464 the remaining 32 A-QTL explained less than 10% of PV and were considered minor QTL (Table  
465 5). Furthermore, a total of 12 A-QTL and three DE-QTL were identified in at least three  
466 environments and were considered stable QTL.

### 467 **Quantitative Trait Loci for Grain Protein Content**

468 A total of 11 A-QTL and 18 DE-QTL were detected for grain protein content (Table 5;  
469 Table 6; Figure 2). The 11 A-QTL were located on chromosomes /linkage groups 1A1, 1B1,  
470 2A1, 2B2, 3A2, 3B1, 4B, 5B, and 7A2. No A-QTL was found on the D-genome for grain protein  
471 content in this study. Five A-QTL individually explained over 10% of PV and were considered  
472 major A-QTL. The major A-QTL were located on chromosomes/linkage groups 1A1, 2A1, 3B1,  
473 4B, and 5B (Table 5; Figure 2). Three A-QTL were detected in more than three environments  
474 and were considered stable A-QTL. Two of these stable A-QTL, *AQ.GPC.ndsu.1A* and  
475 *AQ.GPC.ndsu.5B*, explained up to 13.69% and 20.18% of PV for grain protein content,  
476 respectively, and were also considered major QTL. For this trait, both parental genotypes  
477 contributed positive alleles, although the majority of the alleles (including the three stable A-  
478 QTL) were contributed by the cultivar Glenn (Table 5; Figure 2). The QTL *AQ.GPC.ndsu.7A*  
479 showed sequence similarity with wheat HMGB1 mRNA for high mobility globular protein.  
480 Christov et al. (2007) suggested the wheat HMGB1 protein may have a specific function as a  
481 general regulator of gene expression during cold acclimation in wheat.

482 The results of digenic epistatic effects for grain protein content are shown in Table 6. The  
483 accumulated contribution of these nine epistatic interactions for grain protein content was  
484 ~16.38%. These DE-QTL were located on pairs of linkage groups 1A1/7D3, 1A1/7D3, 2B2/5B1,

485 3B1/2D2, 4A1/7B1, 4A1/6D2, 5A3/2B2, 5B/6D1, and 6B1/2D2. Unlike A-QTL, DE-QTL for  
486 grain protein content were identified on the D-genome. The majority of these DE-QTL showed  
487 negative values for digenic epistatic effects indicating the positive effects of recombinant  
488 genotypic combinations on grain protein content. The *AQ.GPC.ndsu.5B* had the most important  
489 main effect on grain protein content, and the *AQ.BA.ndsu.6D* had a significant main effect on  
490 BA; the epistatic interaction between these A-QTL had a positive effect on grain protein content.  
491 The parental genotypic combinations increased grain protein content through this interaction  
492 (Table 6).

### 493 **Quantitative Trait Loci for Flour Extraction and Mixograph-related Parameters**

494 A total of 32 A-QTL and 51 DE-QTL were identified for flour extraction and mixograph-  
495 related parameters (Table 5; Table 6; Figure 2). These 32 A-QTL were located across all 21  
496 wheat chromosomes except chromosomes 1D, 2B, 3D, 5A, 6A, and 6D. A total of 19 A-QTL  
497 individually explained more than 10% of PV and were considered major A-QTL. Out of these A-  
498 QTL, five stable A-QTL were found for these traits, one stable A-QTL for flour extraction  
499 (*AQ.FE.ndsu.3B*) and four stable A-QTL for mixograph MID line peak time  
500 (*AQ.MMLPT.ndsu.1B*, *AQ.MMLPT.ndsu.5D*, *AQ.MMLPT.ndsu.3B.2*, and *AQ.MMLPT.ndsu.2D*).  
501 For all of these stable A-QTL, except the *AQ.MMLPT.ndsu.1B*, the alleles were contributed  
502 through the Traverse cultivar. The *AQ.MMLPT.ndsu.1B* A-QTL was identified in six out of nine  
503 environments and explained up to 24.35% of PV for MMLPT. This A-QTL was considered the  
504 most stable A-QTL, which had the highest effect on MMLPT (Table 5).

505 The results of DE-QTL for flour extraction and mixograph-related parameters are shown  
506 in Table 6. A total of 49 DE-QTL were detected on all wheat chromosomes except chromosome



507 3D. The individual epistatic interactions explained ~0.77% to ~8.15% of PV for flour extraction  
508 and mixograph parameters. Three stable digenic epistatic interactions were found for these traits:  
509 one DE-QTL (*DEQ.FE.ndsu.5A1/1D1*) for flour extraction and two DE-QTL  
510 (*DEQ.MMLPT.ndsu.2A2/4B1* and *DEQ.MMLPT.ndsu.4A1/5A1*) for mixograph MID line peak  
511 time. The *DEQ.FE.ndsu.5A1/1D1* DE-QTL explained only up to 3.84% of PV for flour  
512 extraction. The parental genotypic combinations of this DE-QTL had a positive effect on the  
513 increase of flour extraction. The *DEQ.MMLPT.ndsu.2A2/4B1* and *DEQ.MMLPT.ndsu.4A1/5A1*  
514 DE-QTL explained only up to 2.19% and 1.66% of PV for mixograph MID line peak time,  
515 respectively. The parental genotypic combinations increased MMPLT through the  
516 *DEQ.MMLPT.ndsu.4A1/5A1* stable DE-QTL, whereas recombinant genotypic combinations  
517 increased MMPLT through the *DEQ.MMLPT.ndsu.2A2/4B1* stable DE-QTL. Overall, both  
518 parental and recombinant genotypic combinations almost equally contributed to the increase of  
519 flour extraction and improvement of the mixograph-related parameters (Table 6).

## 520 **Quantitative Trait Loci for Baking Properties**

521 A total of 31 A-QTL and 15 DE-QTL were detected for baking-related properties in this  
522 study (Table 5; Table 6; Figure 2). These 31 A-QTL individually explained ~2.14% to ~28.06%  
523 of PV for the associated traits. These A-QTL were located on 17 wheat chromosomes excluding  
524 1A, 2B, 3D, and 6A. A total of 19 major A-QTL with PV values over 10% were found for the  
525 baking-related properties. Three stable A-QTL were identified in this study: two A-QTL for  
526 baking absorption (*AQ.BA.ndsu.4D.1* and *AQ.BA.ndsu.1B*) and one A-QTL (*AQ.BMT.ndsu.5D*)  
527 for bake-mixing time. Although the Glenn cultivar contributed over 60% of the desirable alleles  
528 for the baking-related properties in this study, the cultivar Traverse contributed the desirable

529 alleles for these three stable A-QTL. The *AQ.BA.ndsu.4D.1* stable A-QTL associated with  
530 baking absorption had the highest PV (~28.06%) for end-use quality traits in this study (Table 5).

531 The results of digenic epistatic interactions for the baking-related properties are presented  
532 in Table 6. Out of the six baking-related properties evaluated in this study, digenic epistatic  
533 effects were only identified for baking absorption, bread loaf volume, and bake-mixing time  
534 traits with one, one, and 13 digenic epistatic interactions, respectively. The DE-QTL,  
535 *DEQ.BA.ndsu.1A1/1A1* and *DEQ.BLV.ndsu.6D1/7D3*, explained ~6.94% and ~3.37% of PV for  
536 baking absorption and bread loaf volume, respectively. The accumulated contribution of the 13  
537 DE-QTL for bake-mixing time was ~26.29%. Both parental and recombinant genotypic  
538 combinations contributed to the increase of bake-mixing time, whereas only the parental  
539 genotypic combinations had positive effects on baking absorption and BLV (Table 6).

#### 540 **Co-Localized Quantitative Trait Loci**

541 A total of 19 additive co-localized (closely linked or pleiotropic) QTL, and four epistatic  
542 co-localized QTL were found in this study (Table 5; Table 6; Figure 2). These 19 additive co-  
543 localized QTL were mainly located on the A- and B-genomes (Table 5; Figure 2). Positive  
544 pleiotropy was shown in 14 out of 19 additive co-localized QTL, where the additive effects of a  
545 locus on multiple traits were of the same sign. In contrast, negative pleiotropic effects were  
546 observed for five co-localized QTL on chromosomes/linkage groups 1A1, 2A1, 2A1, 4A, and 4D  
547 harboring major A-QTL, respectively, for grain protein content and flour extraction; grain  
548 protein content and bake-mixing time; grain protein content and mixograph MID line peak time;  
549 flour extraction, mixograph MID line time \* value, and baking absorption; and mixograph  
550 envelope left slope, mixograph envelope right slope, and baking absorption. Overall,

551 approximately 63% of A-QTL with close linkage or pleiotropic effects on the integrated set of  
552 traits (Table 5; Figure 2) were considered major A-QTL. Additive co-localized QTL for the end-  
553 use quality traits are shown in more detail in Table 5.

554 In addition to additive co-localized QTL, four epistatic co-localized QTL (“epistatic pleiotropy,”  
555 Wolf et al., 2005) were identified in this study (Table 6). These epistatic co-localized QTL were  
556 located on pairs of linkage groups 1A1/7A1, 5A1/7D3, 1A1/7D3, and 1B1/7B1 associated with  
557 general mixograph pattern and mixograph MID line time \* value; mixograph MID line peak  
558 time, mixograph MID line peak integral, and mixograph MID line time \* value; grain protein  
559 content and mixograph envelope right slope; and mixograph MID line peak value and mixograph  
560 MID line time \* value, respectively (Table 6). All epistatic co-localized QTL except one  
561 (1A1/7D3 for the integrated set of grain protein content and mixograph envelope right slope  
562 traits) showed positive pleiotropic effects (Table 6).

## 563 **Discussion**

### 564 **Phenotypic Evaluation**

565 It is well documented that end-use quality traits in wheat are complex and are influenced  
566 by a combination of environmental conditions and genetic factors (Rousset et al. 1992; Peterson  
567 et al. 1998; Tsilo et al. 2011; Simons et al. 2012). The power and accuracy of QTL detection are  
568 highly dependent on choosing the parental lines (Jansen 2001). In other words, power of  
569 accuracy depend on allelic polymorphism and phenotypic variation between parental lines  
570 (Mason et al. 2013). In the current study, the RIL population was developed from a cross  
571 between Glenn (PI 639273) and Traverse (PI 642780). Glenn has excellent end-use quality

572 characteristics. By comparison, Traverse has a high grain yield but poor end-use quality  
573 characteristics. As expected, our results showed significantly different values between the  
574 parental lines for most of the end-use quality traits. The RIL population showed continuous  
575 variation and transgressive segregation for all the end-use quality characteristics, suggesting the  
576 polygenetic inheritance and contribution, particularly of positive alleles for the end-use quality  
577 traits by both parental lines.

578         Our results showed a wide range of broad-sense heritability (0.23 – 0.77) for mixograph-  
579 related parameters, suggesting environmental effects had a wide range of influences on the  
580 phenotypic values of the mixograph-related parameters. These results were in agreement with  
581 those of Patil et al. (2009), who also reported a wide heritability range of 0.17 to 0.96 for  
582 mixograph-relative parameters. In contrast to our results, Tsilo et al. (2011) and Prashant et al.  
583 (2015) found high broad-sense heritability for most of the end-use quality traits in wheat.  
584 Similarly, the current study, Echeverry-Solarte et al. (2015) reported very high broad-sense  
585 heritability for flour extraction and MMLPT.

586         The genetic and Pearson correlation analyses revealed most of the end-use quality traits  
587 were associated with each other. Several previous studies have also reported similar results (Patil  
588 et al. 2009; Tsilo et al. 2011; Prashant et al. 2015; Echeverry-Solarte et al. 2015). Our results  
589 showed differences between genetic and phenotypic correlation coefficients for end-use quality  
590 traits. These differences could be due to low heritability values for these traits as was reported by  
591 Hill and Thompson (1978). Notably, although there were differences between the genetic and  
592 phenotypic correlation coefficients, the pattern and magnitude of these coefficients were similar.

593 These similarities suggest the phenotypic correlation could be a fair estimate of the genetic  
594 correlation for end-use quality traits in wheat.

### 595 **High-Density Linkage Map**

596 Genetic linkage maps have played important roles in detecting QTL, MAS, cloning  
597 genes, and genome structure analysis (Maccaferri et al 2014; Jin et al. 2016). In the present  
598 study, the wheat Illumina 90K iSelect assay was used to genotype Glenn and Traverse and all  
599 127 RILs derived from these two parents. Our study resulted in a much higher genome coverage  
600 and resolution compared to the most of the previous genetic linkage maps for the genetic  
601 dissection of end-use quality traits in wheat (Groos et al. 2003; Echeverry-Solarte et al. 2015;  
602 Boehm et al. 2017). Marker density of 0.33 cM between any two markers indicated a significant  
603 improvement over earlier genetic maps developed with either microsatellite markers (Tsilo et al.  
604 2010; Simons et al. 2012), DArT markers (Echeverry-Solarte et al. 2015), or SNP makers  
605 (Boehm et al. 2017). The genetic map length of 2,644.82 cM improved significantly the genome  
606 coverage compared to the other developed map for the genetic analysis of end-use quality traits  
607 in wheat using the wheat Illumina 90K iSelect assay (Boehm et al. 2017), where the map size  
608 was 1813.4 cM.

### 609 **Genetics of Grain Protein Content**

610 Improving grain protein content is one of the principal objectives of most wheat breeding  
611 programs. Previous studies have reported few major and several minor QTL for grain protein  
612 content, suggesting the polygenic nature and quantitative inheritance of this trait (Jonhson et al.  
613 1978; Bogard et al. 2013; Echeverry-Solarte et al. 2015; Li et al. 2016). The most significant A-  
614 QTL in this study, *AQ.GPC.ndsu.5B*, identified on chromosome 5B, was also involved in a

615 digenic epistatic interaction. Previous studies have reported an A-QTL associated with grain  
616 protein content on the long arm of chromosome 5B (Kulwal et al. 2005; Bordes et al. 2013;  
617 Echeverry-Solarte et al. 2015). However, unlike previous studies, this study identified the  
618 *AQ.GPC.ndsu.5B* A-QTL on the short arm of chromosome 5B, suggesting the novelty of this  
619 major A-QTL. Similar to our results, Prasad et al. (2003) and Groos et al. (2003) reported an A-  
620 QTL for grain protein content on chromosome 7A (Table 5). It is worthwhile to note that the  
621 minor stable A-QTL, *AQ.GPC.ndsu.7A*, showed nucleotide sequence similarity with the wheat  
622 HMGB1 protein. Christov et al. (2007) reported the wheat HMGB1 protein may play a major  
623 role in controlling general aspects of gene expression through chromatin structure modification.  
624 In addition to this significant role, Christov et al. (2007) also mentioned this protein possibly has  
625 a specific function as a general regulator of gene expression during cold stresses. Further studies  
626 are needed to elucidate the similarity between the *AQ.GPC.ndsu.7A* A-QTL and the wheat  
627 HMGB1 protein. As it was expected, most of the alleles for increased grain protein content were  
628 contributed by the cultivar Glenn.

### 629 **Genetics of Flour Extraction Rate and Mixograph-related Parameters**

630 Flour extraction rate and mixograph-related parameters are important end-use quality  
631 traits for the milling industries. Both flour extraction and mixograph-related parameters are  
632 quantitative traits controlled by multiple genes (Campbell et al. 2001; Breseghello et al. 2005;  
633 Breseghello and Sorrells 2006; Simons et al. 2012; Echeverry-Solarte et al. 2015). This study  
634 found one stable A-QTL (*AQ.FE.ndsu.3B*) on chromosome 3B for flour extraction. Similarly,  
635 Carter et al. (2012) and Ishikawa et al. (2015) also reported a stable A-QTL with a minor effect  
636 on chromosome 3B for flour extraction (Table 5). Besides the A-QTL, this study also identified a

637 stable DE-QTL (*DEQ.FE.ndsu.5A1/1D1*) for flour extraction. In addition, the *AQ.BLV.ndsu.5A*  
638 A-QTL, which showed a significant main effect for bread loaf volume, was involved in the  
639 epistatic interaction of the *DEQ.FE.ndsu.5A1/1D1* DE-QTL. Xing et al. (2014) indicated  
640 epistatic interactions could play an important role in the genetic basis of complex traits. Xing et  
641 al. (2002) and Yu et al. (1997) also mentioned epistatic effects should be much more sensitive to  
642 environmental effects than to main effects, making the detection of a stable QTL with an  
643 epistatic effect more difficult. This study is likely the first to report that a stable QTL with an  
644 epistatic effect for flour extraction. The majority of the positive alleles for flour extraction were  
645 contributed from the Traverse cultivar.

646 Previous studies have shown the effects of HMW-GS and LMW-GS on mixograph-related  
647 parameters (Payne et al. 1981; Brett et al. 1993; Gupta and MacRitchie 1994; Ruiz and Carrillo  
648 1995; Maucher et al. 2009; Zhang et al. 2009; Branlard et al. 2001; He et al. 2005; Liu et al.  
649 2005; Mann et al. 2009; Jin et al. 2013; Echeverry-Solarte et al. 2015; Jin et al. 2016). In the  
650 current study, a stable A-QTL (*AQ.MMLPT.ndsu.1B*) with a major effect on mixograph MID  
651 line peak time was detected on chromosome 1B, close to the location of the Glu-B1 gene  
652 encoding for HMW-GS. Similarly, a recent study reported a major stable A-QTL for mixograph  
653 MID line peak time in the same region close to the Glu-B1 gene (Jin et al. 2016). The favorable  
654 alleles for this A-QTL were contributed through the Glenn cultivar. The three stable A-QTL  
655 (*AQ.MMLPT.ndsu.2D*, *AQ.MMLPT.ndsu.3B.2*, and *AQ.MMLPT.ndsu.5D*) for mixograph MID  
656 line peak time on chromosomes 2D, 3B, and 5D, respectively, seem to be novel, with Traverse  
657 contributing the desirable alleles. In addition to the A-QTL, this study identified two novel stable  
658 epistatic DE-QTL (*DEQ.MMLPT.ndsu.2A2/4B1* and *DEQ.MMLPT.ndsu.4A1/5A1*) for

659 mixograph MID line peak time on pairs of linkage groups 2A2/4B1 and 4A1/5A1, respectively.  
660 In another study, El-Feki et al. (2013) identified a significant epistatic interaction between the  
661 Glu-B1 locus on chromosome B1 and a QTL region near the microsatellite marker *Xwmc76* on  
662 chromosome 7B for mixograph MID line peak time in a doubled haploid hard winter wheat  
663 population.

#### 664 **Genetics of Baking Properties**

665 Baking quality evaluations are the final assessments to allow breeders to determine the  
666 appropriateness of a new wheat line to be released and accepted by the end users. Despite the  
667 importance of baking quality, limited information is available on the genetic control of baking  
668 properties. Previous studies have indicated the effects of HMW-GS on baking properties  
669 (Campbell et al. 2001; Rousset et al. 2001; Huang et al. 2006; Mann et al. 2009; Tsilo et al.  
670 2010). In the current study, the locations of two major A-QTL (*AQ.BMT.ndsu.1B* and  
671 *AQ.BMT.ndsu.1B.2*) for bake-mixing time were found to be close to the location of the Glu-B1  
672 gene. Besides these two A-QTL, three stable A-QTL were detected for baking properties,  
673 *AQ.BA.ndsu.4D.1*, *AQ.BA.ndsu.1B*, and *AQ.BMT.ndsu.3A*. Similar to the *AQ.BMT.ndsu.1B* and  
674 *AQ.BMT.ndsu.1B.2* A-QTL for bake-mixing time, the favorable allele for the *AQ.BMT.ndsu.3A*  
675 A-QTL was contributed by Glenn cultivar. Conversely, the favorable alleles for the  
676 *AQ.BA.ndsu.4D.1* and *AQ.BA.ndsu.1B* A-QTL were contributed by Traverse cultivar. Similar  
677 results were reported by Kuchel et al. (2006) and Tsilo et al. (2011) who found A-QTL for  
678 baking absorption on chromosome 1B (Table 5). The previous studies reported A-QTL for bread  
679 loaf volume on every wheat chromosome except chromosomes 3D, 4A, 5A, and 6A (Mann et al.  
680 2009; Simons et al. 2012; Tsilo et al. 2012). Unlike these reports, our study found a major A-



681 QTL (*AQ.BLV.ndsu.5A*) for bread loaf volume on chromosome 5A. This study found one A-  
682 QTL with minor effect (*AQ.CBCL.ndsu.6B*) on chromosome 6B for crumb color. This A-QTL  
683 was located very close to the position of the A-QTL (*gwm193*) that Groos et al. (2007) reported  
684 for crumb grain score. In the current study, for the first time, a stable A-QTL (*AQ.BMT.ndsu.5D*)  
685 was identified on chromosome 5D for bake-mixing time. Two novel major A-QTL  
686 (*AQ.CTCL.ndsu.6B.1* and *AQ.CTCL.ndsu.7A*) on chromosomes 6B and 7A were detected for  
687 crust color. To our knowledge, there is no previous works reporting the digenic epistatic  
688 interaction effects for baking properties. Our study showed a total of 15 DE-QTL were identified  
689 addressing this issue confirming the complex nature of inheritance of the baking properties of  
690 wheat flour.

#### 691 **Closely Linked or Pleiotropic Effects**

692 Pleiotropic QTL could be valuable in the simultaneous improvement of several traits. Our  
693 results showed most of the end-use quality traits were associated with each other. Thus, it was  
694 expected to be able to identify co-localized (closely linked or pleiotropic) QTL controlling these  
695 traits. A total of 19 additive co-localized QTL were identified for the end-use quality traits in the  
696 current study. This is results is in agreement with previous studies (Cheverud 2000; Leamy et al.  
697 2002; Wolf et al. 2006) who reported that most of these additive co-localized QTL (~74%)  
698 showed positive pleiotropy. The loci controlling functionally integrated groups of traits are  
699 known to show positive pleiotropy (Cheverud 2000; Leamy et al. 2002; Wolf et al. 2006).  
700 However, five additive pleiotropic loci showed negative pleiotropy in the current study. These  
701 five additive co-localized QTL harbored A-QTL for grain protein content and flour extracion;  
702 grain protein content and bake-mixing time; MMPLT and grain protein content; flour extraction,

703 baking absorption, and mixograph MID line time \* value; and baking absorption, mixograph  
704 envelope right slope, and mixograph envelope left slope on chromosomes 1A, 1B, 2A, 4A, and  
705 4D, respectively. Similar results were reported by Echeverry-Solarte et al. (2015) who found a  
706 co-localized QTL with negative pleiotropy on chromosome 5B for three integrated sets of traits  
707 (grain protein content, mixograph envelope peak time, and mixograph MID line peak time,  
708 where alleles from the exotic parent (WCB617) increased grain protein content, but decreased  
709 mixograph envelope peak time and mixograph MID line peak time. In the current study, the most  
710 important co-localized QTL was identified on chromosome 1B, which harbored two major A-  
711 QTL (*AQ.BMT.ndsu.1B.2* and *AQ.MMLPT.ndsu.1B*) for bake-mixing time and mixograph MID  
712 line peak time, respectively. Moreover, this co-localized QTL was located very close to the  
713 location of the Glu-B1 gene. Furthermore, this showed positive pleiotropy, where the desirable  
714 alleles were contributed through the Glenn cultivar. This positive pleiotropy indicated that a  
715 simultaneous improvement of bake-mixing time and MMPLT would be possible through  
716 selection. Besides the additive co-localized QTL, four epistatic co-localized QTL were identified  
717 in the current study. It is generally accepted that additive pleiotropic effects are more common  
718 than epistatic pleiotropic effects (Wolf et al. 2005 and 2006). Thus, as expected, the frequency of  
719 epistatic co-localized QTL was less than the frequency of additive co-localized QTL. The current  
720 study appears to be the first to report for epistatic co-localized QTL for end-use quality traits in  
721 wheat. Furthermore, all epistatic showed positive pleiotropy effect except one, which harbored  
722 A-QTL on pairs of linkage group 1A1/7D3 for grain protein content and mixograph envelope  
723 right slope. This negative pleiotropy is in contrast with previous findings; Wolf et al. (2005)

724 suggested positive pleiotropy might be generally expected in epistatic pleiotropic analyses of  
725 integrated sets of traits.

## 726 **Conclusion**

727 The current study suggests that flour extraction, mixograph envelope right slope,  
728 mixograph MID line peak time, and bake-mixing time can be used for the evaluation of the end-  
729 use quality traits in wheat breeding programs due to their high broad-sense heritability values.  
730 Overall, both parental lines (Glenn and Traverse) contributed desirable alleles that had positive  
731 effects on the end-use quality traits, suggesting both parental lines could be excellent resources  
732 to improve end-use quality traits in wheat breeding programs.

733 In the current study, a much improved high-density SNP-based linkage map was  
734 constructed and used to identify QTL for end-use quality traits in wheat. It is worthwhile to note  
735 the use of the wheat Illumina 90K iSelect assay resulted in a better improvement in genome  
736 coverage, marker density, and identification of QTL compared to previous studies for end-use  
737 quality traits in wheat.

738 This study identified 12 stable major main effect QTL and three stable digenic epistatic  
739 interactions for the end-use quality traits in wheat. This suggests that both additive and digenic  
740 epistatic effects should be considered for these traits in molecular wheat breeding programs, such  
741 as MAS. Furthermore, a total of 23 closely-linked or pleiotropic loci were identified in this  
742 study. The co-localized QTL could be valuable to simultaneously improve the end-use quality  
743 traits via selection procedures in wheat breeding programs. The information provided in the

744 current study could be used in molecular wheat breeding programs to enhance selection

745 efficiency and to improve the end-use quality traits in wheat.

746

747

748

749

750

751

752

753

754

755

756

757

758

759

760 **Acknowledgments**

761           The authors would like to thank Dr. J.J. Hammond, Dr. A. Green, Dr. A. El-Fatih  
762 ElDolfey, J. Underdahl, M.Abdallah, A.Walz, T. Selland, D. Olsen, K. McMonagle, C.Cossette,  
763 K. Dickey, K. Whitney, and K. Beck for their help and support.

764

765

766

767

768

769

770

771

772

773

774

775

776

777

778 **References**

- 779 AACC International. Approved Methods of Analysis, t.E., Approved November 3, 1999a  
780 Method-10-09-01. Basic Straight-Dough Bread-Baking Method -- Long Fermentation.  
781 AACC International, St. Paul, MN, U.S.A.
- 782 AACC International. Approved Methods of Analysis, t.E., Approved November 3, 1999b  
783 Method-39-10-01. Near-Infrared Reflectance Method for Protein Determination in Wheat  
784 Flour. AACC International, St. Paul, MN, U.S.A.
- 785 AACC International. Approved Methods of Analysis, t.E., Approved November 3, 1999c  
786 Method-54-40-02. Mixograph Method. AACC International, St. Paul, MN, U.S.A.
- 787 AACC International. Approved Methods of Analysis, t.E., Approved November 3, 1999  
788 Method-26-50-01. Brabender Quadrumat Jr. (Quadruplex) Method. AACC International,  
789 St. Paul, MN, U.S.A.
- 790 Alamri, M.S., F.A. Manthey, M. Mergoum, E.M. Elias, and K. Khan, 2009a Assessing Spring  
791 Wheat Quality using the Glutograph Instrument, pp. 124-131, Cereal Foods World.
- 792 Alamri, M.S., F.A. Manthey, M. Mergoum, E.M. Elias, and K. Khan, 2009b Use of the  
793 Glutograph Instrument in Durum Wheat Quality Evaluation, pp. 23-32, Plant Sciences  
794 Research.
- 795 Arbelbide, M., and R. Bernardo, 2006 Mixed-model QTL mapping for kernel hardness and  
796 dough strength in bread wheat. Theoretical and Applied Genetics 112 (5):885-890.

- 797 Bogard, M., V. Allard, P. Martre, E. Heumez, J.W. Snape et al., 2013 Identifying wheat genomic  
798 regions for improving grain protein concentration independently of grain yield using  
799 multiple inter-related populations. *Molecular Breeding* 31 (3):587-599.
- 800 Boehm, J.D., M.I. Ibba, A.M. Kiszonas, D.R. See, D.Z. Skinner et al. 2017 Identification of  
801 genotyping-by-sequencing sequence tags associated with milling performance and end-  
802 use quality traits in elite hard red spring wheat (*Triticum aestivum* L.). *Journal of Cereal*  
803 *Science* 77:3–83.
- 804 Bordes, J., C. Ravel, J.P. Jaubertie, B. Duperrier, O. Gardet et al., 2013 Genomic regions  
805 associated with the nitrogen limitation response revealed in a global wheat core  
806 collection. *Theoretical and Applied Genetics* 126 (3):805-822.
- 807 Branlard, G., M. Dardevet, R. Saccomano, F. Lagoutte, and J. Gourdon, 2001 Genetic diversity  
808 of wheat storage proteins and bread wheat quality. *Euphytica* 119 (1-2):59-67.
- 809 Breseghello, F., P.L. Finney, C. Gaines, L. Andrews, J. Tanaka et al., 2005 Genetic loci related  
810 to kernel quality differences between a soft and a hard wheat cultivar. *Crop Science* 45  
811 (5):1685-1695.
- 812 Breseghello, F., and M.E. Sorrells, 2006 Association mapping of kernel size and milling quality  
813 in wheat (*Triticum aestivum* L.) cultivars. *Genetics* 172 (2):1165-1177.

- 814 Brett, G.M., E.N.C. Mills, A.S. Tatham, R.J. Fido, P.R. Shewry et al., 1993 Immunochemical  
815 identification of lmw subunits of glutenin associated with bread-making quality of wheat  
816 flours. *Theoretical and Applied Genetics* 86 (4):442-448.
- 817 Campbell, K.G., P.L. Finney, C.J. Bergman, D.G. Gualberto, J.A. Anderson et al., 2001  
818 Quantitative trait loci associated with milling and baking quality in a soft x hard wheat  
819 cross. *Crop Science* 41 (4):1275-1285.
- 820 Carter, A.H., K. Garland-Campbell, C.F. Morris, and K.K. Kidwell, 2012 Chromosomes 3B and  
821 4D are associated with several milling and baking quality traits in a soft white spring  
822 wheat (*Triticum aestivum* L.) population. *Theoretical and Applied Genetics* 124 (6):1079-  
823 1096.
- 824 Cheverud, J.M., 2000 Detecting epistasis among quantitative trait loci pp. 58-81 in *Epistasis and*  
825 *the evolutionary process*, edited by E.D.B. Jason B. Wolf, Michael John Wade. Oxford  
826 University Press.
- 827 Christov, N.K., S. Yoneyama, Y. Shimamoto, and R. Imai, 2007 Differential expression of wheat  
828 genes during cold acclimation. *Cytology and Genetics* 41 (3):142-150.
- 829 Deng, Z.Y., S.N. Hu, F. Chen, W.J. Li, J.S. Chen et al., 2015 Genetic dissection of interaction  
830 between wheat protein and starch using three mapping populations. *Molecular Breeding*  
831 35 (1).



- 832 Doyle, J.J., and J.L. Doyle, 1987 A rapid DNA isolation procedure for small quantities of fresh  
833 leaf tissue, pp. 11-15, *Phytochemical Bulletin*.
- 834 Echeverry-Solarte, M., A. Kumar, S. Kianian, S. Simsek, M.S. Alamri et al., 2015 New QTL  
835 alleles for quality-related traits in spring wheat revealed by RIL population derived from  
836 supernumerary x non-supernumerary spikelet genotypes. *Theoretical and Applied*  
837 *Genetics* 128 (5):893-912.
- 838 El-Feki, W.M., P.F. Byrne, S.D. Reid, and S.D. Haley, 2015 Registration of CO940610/'Platte'  
839 Wheat Doubled Haploid Mapping Population. *Journal of Plant Registrations* 9 (3):419-  
840 423.
- 841 Fatokun, C.A., D.I. Menanciohautea, D. Danesh, and N.D. Young, 1992 Evidence for  
842 orthologous seed weight genes in cowpea and mung bean based on rflp mapping.  
843 *Genetics* 132 (3):841-846.
- 844 Galande, A.A., R. Tiwari, J.S.S. Ammiraju, D.K. Santra, M.D. Lagu et al., 2001 Genetic analysis  
845 of kernel hardness in bread wheat using PCR-based markers. *Theoretical and Applied*  
846 *Genetics* 103 (4):601-606.
- 847 Gras, P.W., R.S. Anderssen, M. Keentok, F. Bekes, and A. R., 2001 Gluten protein functionality  
848 in wheat flour processing: a review, pp. 1311–1323. *Australian Journal of Agricultural*  
849 *Research*.

- 850 Groos, C., N. Robert, E. Bervas, and G. Charmet, 2003 Genetic analysis of grain protein-content,  
851 grain yield and thousand-kernel weight in bread wheat. *Theoretical and Applied Genetics*  
852 106 (6):1032-1040.
- 853 Gupta, R.B., and F. Macritchie, 1994 Allelic variation at glutenin subunit and gliadin loci, glu-1,  
854 glu-3 and gli-1 of common wheats .2. Biochemical basis of the allelic effects on dough  
855 properties. *Journal of Cereal Science* 19 (1):19-29.
- 856 Hallauer, A.R., and J.B. Miranda, 1987 Quantitative genetics in maize breeding: Iowa State  
857 University Pres. Ames.
- 858 He, Z.H., L. Liu, X.C. Xia, J.J. Liu, and R.J. Pena, 2005 Composition of HMW and LMW  
859 glutenin subunits and their effects on dough properties, pan bread, and noodle quality of  
860 Chinese bread wheats. *Cereal Chemistry* 82 (4):345-350.
- 861 Hill, W.G., and R. Thompson, 1978 Probabilities of non-positive definite between-group or  
862 genetic covariance matrices. *Biometrics* 34 (3):429-439.
- 863 Holland, J.B., 2006 Estimating genotypic correlations and their standard errors using  
864 multivariate restricted maximum likelihood estimation with SAS Proc MIXED. *Crop*  
865 *Science* 46 (2):642-654.
- 866 Holland, J.B., W.E. N., and C.T. CM., 2003 Estimating and interpreting heritability for plant  
867 breeding: an update, pp. 9-112 in *Plant breeding reviews*.

- 868 Huang, X.Q., S. Cloutier, L. Lycar, N. Radovanovic, D.G. Humphreys et al., 2006 Molecular  
869 detection of QTLs for agronomic and quality traits in a doubled haploid population  
870 derived from two Canadian wheats (*Triticum aestivum* L.). *Theoretical and Applied*  
871 *Genetics* 113 (4):753-766.
- 872 Ishikawa, G., K. Nakamura, H. Ito, M. Saito, M. Sato et al., 2014 Association Mapping and  
873 Validation of QTLs for Flour Yield in the Soft Winter Wheat Variety Kitahonami. *Plos*  
874 *One* 9 (10).
- 875 Jansen, J., A.G. de Jong, and J.W. van Ooijen, 2001 Constructing dense genetic linkage maps.  
876 *Theoretical and Applied Genetics* 102 (6-7):1113-1122.
- 877 Jin, H., W. Wen, J.D. Liu, S.N. Zhai, Y. Zhang et al., 2016 Genome-Wide QTL Mapping for  
878 Wheat Processing Quality Parameters in a Gaocheng 8901/Zhoumai 16 Recombinant  
879 Inbred Line Population. *Frontiers in Plant Science* 7.
- 880 Jin, H., Y. Zhang, G.Y. Li, P.Y. Mu, Z.R. Fan et al., 2013 Effects of allelic variation of HMW-  
881 GS and LMW-GS on mixograph properties and Chinese noodle and steamed bread  
882 qualities in a set of Aroona near-isogenic wheat lines. *Journal of Cereal Science* 57  
883 (1):146-152.
- 884 Johnson, V.A., K.D. Wilhelmi, S.L. Kuhr, P.J. Mattern, and J.W. Schmidt, 1978 Breeding  
885 progress for protein and lysine in wheat, pp. 825-835 in *Proc. V. International Wheat*  
886 *Genet. Symp*, New Dehli, India.

- 887 Kosambi, D.D., 1944 The estimation of map distances from recombination values, pp. 172-175.  
888 Ann Eugen t2.
- 889 Kuchel, H., P. Langridge, L. Mosionek, K. Williams, and S.P. Jeffries, 2006 The genetic control  
890 of milling yield, dough rheology and baking quality of wheat. Theoretical and Applied  
891 Genetics 112 (8):1487-1495.
- 892 Kulwal, P., N. Kumar, A. Kumar, R. Gupta, H. Balyan et al., 2005 Gene networks in hexaploid  
893 wheat: interacting quantitative trait loci for grain protein content. Functional &  
894 Integrative Genomics 5 (4):254-259.
- 895 Kumar, A., E.E. Mantovani, R. Seetan, A. Soltani, M. Echeverry-Solarte et al., 2016 Dissection  
896 of Genetic Factors underlying Wheat Kernel Shape and Size in an Elite x Nonadapted  
897 Cross using a High Density SNP Linkage Map. Plant Genome 9 (1).
- 898 Kunert, A., A.A. Naz, O. Dedeck, K. Pillen, and J. Leon, 2007 AB-QTL analysis in winter  
899 wheat: I. Synthetic hexaploid wheat (*T turgidum* ssp *dicoccoides* x *T tauschii*) as a source  
900 of favourable alleles for milling and baking quality traits. Theoretical and Applied  
901 Genetics 115 (5):683-695.
- 902 Lander, E.S., P. Green, J. Abrahamson, A. Barlow, M.J. Daly et al., 2009 MAPMAKER: An  
903 interactive computer package for constructing primary genetic linkage maps of  
904 experimental and natural populations (vol 1 pg 174, 1987). Genomics 93 (4):398-398.

- 905 Leamy, L.J., D. Pomp, E.J. Eisen, and J.M. Cheverud, 2002 Pleiotropy of quantitative trait loci  
906 for organ weights and limb bone lengths in mice. *Physiological Genomics* 10 (1):21-29.
- 907 Li, C.L., G.H. Bai, S.M. Chao, B. Carver, and Z.H. Wang, 2016 Single nucleotide  
908 polymorphisms linked to quantitative trait loci for grain quality traits in wheat. *Crop*  
909 *Journal* 4 (1):1-11.
- 910 Li, J., F. Cui, A.M. Ding, C.H. Zhao, X.Q. Wang et al., 2012a QTL detection of seven quality  
911 traits in wheat using two related recombinant inbred line populations. *Euphytica* 183  
912 (2):207-226.
- 913 Li, Y., Y. Song, R. Zhou, G. Branlard, and J. Jia, 2009 Detection of QTLs for bread-making  
914 quality in wheat using a recombinant inbred line population. *Plant Breeding* 128 (3):235-  
915 243.
- 916 Li, Y.L., R.H. Zhou, J. Wang, X.Z. Liao, G. Branlard et al., 2012b Novel and favorable QTL  
917 allele clusters for end-use quality revealed by introgression lines derived from synthetic  
918 wheat. *Molecular Breeding* 29 (3):627-643.
- 919 Liu, L., Z.H. He, J. Yan, Y. Zhang, X.C. Xia et al., 2005 Allelic variation at the Glu-1 and Glu-3  
920 loci, presence of the 1B.1R translocation, and their effects on mixographic properties in  
921 Chinese bread wheats. *Euphytica* 142 (3):197-204.

- 922 Maccaferri, M., A. Ricci, S. Salvi, S.G. Milner, E. Noli et al. 2014 A high-density, SNP-based  
923 consensus map of tetraploid wheat as a bridge to integrate durum and bread wheat  
924 genomics and breeding. *Plant Biotechnol. J.* 13: 648–663.
- 925 Mann, G., S. Diffey, B. Cullis, F. Azanza, D. Martin et al., 2009 Genetic control of wheat  
926 quality: interactions between chromosomal regions determining protein content and  
927 composition, dough rheology, and sponge and dough baking properties. *Theoretical and*  
928 *Applied Genetics* 118 (8):1519-1537.
- 929 Maucher, T., J.D.C. Figueroa, W. Reule, and R.J. Pena, 2009 Influence of Low Molecular  
930 Weight Glutenins on Viscoelastic Properties of Intact Wheat Kernels and Their Relation  
931 to Functional Properties of Wheat Dough. *Cereal Chemistry* 86 (4):372-375.
- 932 Mergoum, M., R.C. Frohberg, R.W. Stack, T. Olson, T.L. Friesen et al., 2006a Registration of  
933 'Glenn' wheat. *Crop Science* 46 (1):473-474.
- 934 Patil, R.M., M.D. Oak, S.A. Tamhankar, and V.S. Rao, 2009 Molecular mapping of QTLs for  
935 gluten strength as measured by sedimentation volume and mixograph in durum wheat  
936 (*Triticum turgidum* L. ssp durum). *Journal of Cereal Science* 49 (3):378-386.
- 937 Payne, P.I., 1987 Genetics of wheat storage proteins and the effect of allelic variation on bread-  
938 making quality. *Annual review of Plant Physiology and Plant Molecular Biology* 38:141-  
939 153.

- 940 Payne, P.I., L.M. Holt, and C.N. Law, 1981 Structural and genetic-studies on the high-  
941 molecular-weight subunits of wheat glutenin .1. Allelic variation in subunits amongst  
942 varieties of wheat (*triticum-aestivum*). Theoretical and Applied Genetics 60 (4):229-236.
- 943 Peterson, C.J., R.A. Graybosch, D.R. Shelton, and P.S. Baenziger, 1998 Baking quality of hard  
944 winter wheat: Response of cultivars to environment in the great plains (Reprinted from  
945 Wheat: Prospects for global improvement, 1998). Euphytica 100 (1-3):157-162.
- 946 Prasad, M., N. Kumar, P.L. Kulwal, M.S. Roder, H.S. Balyan et al., 2003 QTL analysis for grain  
947 protein content using SSR markers and validation studies using NILs in bread wheat.  
948 Theoretical and Applied Genetics 106 (4):659-667.
- 949 Rousset, M., P. Brabant, R.S. Kota, J. Dubcovsky, and J. Dvorak, 2001 Use of recombinant  
950 substitution lines for gene mapping and QTL analysis of bread making quality in wheat.  
951 Euphytica 119 (1-2):81-87.
- 952 Rousset, M., J.M. Carrillo, C.O. Qualset, and D.D. Kasarda, 1992 Use of recombinant inbred  
953 lines of wheat for study of associations of high-molecular-weight glutenin subunit alleles  
954 to quantitative traits .2. Milling and bread-baking quality. Theoretical and Applied  
955 Genetics 83 (4):403-412.
- 956 Ruiz, M., and J.M. Carrillo, 1995 Relationships between different prolamin proteins and some  
957 quality properties in durum-wheat. Plant Breeding 114 (1):40-44.
- 958 SAS, I., 2012 SAS 9.3 for Windows. SAS Institute.

- 959 Simons, K., J.A. Anderson, M. Mergoum, J.D. Faris, D.L. Klindworth et al., 2012 Genetic  
960 Mapping Analysis of Bread-Making Quality Traits in Spring Wheat. *Crop Science* 52  
961 (5):2182-2197.
- 962 Simsek, S., The NDSU Wheat Quality and Carbohydrate Research Lab protocol
- 963 Souza, E. J., Graybosch, R. A., and Guttieri, M. 2002 Breeding wheat for improved milling and  
964 baking quality. *J. Crop Prod.* (5):39–74.
- 965 Stone, P.J., and R. Savin, 1999 Grain quality and its physiological determinants. *Wheat: ecology*  
966 *and physiology of yield determination*:85-120.
- 967 Tiwari, C., H. Wallwork, B. Arun, V.K. Mishra, G. Velu et al., 2016 Molecular mapping of  
968 quantitative trait loci for zinc, iron and protein content in the grains of hexaploid wheat.  
969 *Euphytica* 207 (3):563-570.
- 970 Tsilo, T.J., G.A. Hareland, S. Simsek, S.M. Chao, and J.A. Anderson, 2010 Genome mapping of  
971 kernel characteristics in hard red spring wheat breeding lines. *Theoretical and Applied*  
972 *Genetics* 121 (4):717-730.
- 973 Tsilo, T.J., S. Simsek, J.B. Ohm, G.A. Hareland, S.M. Chao et al., 2011 Quantitative trait loci  
974 influencing endosperm texture, dough-mixing strength, and bread-making properties of  
975 the hard red spring wheat breeding lines. *Genome* 54 (6):460-470.
- 976 Vachal, K., and L. Benson, 2010 North Dakota Grain and Oilseed Transportation Statistics 2009-  
977 10. Fargo, N.D. Upper Great Plains Transportation Institute.



- 978 Voorrips, R.E., 2002 MapChart: Software for the graphical presentation of linkage maps and  
979 QTLs. *Journal of Heredity* 93 (1):77-78.
- 980 Wang, G.M., J.M. Leonard, A.S. Ross, C.J. Peterson, R.S. Zemetra et al., 2012 Identification of  
981 genetic factors controlling kernel hardness and related traits in a recombinant inbred  
982 population derived from a soft x 'extra-soft' wheat (*Triticum aestivum* L.) cross.  
983 *Theoretical and Applied Genetics* 124 (1):207-221.
- 984 Wang, S.C., D.B. Wong, K. Forrest, A. Allen, S.M. Chao et al., 2014 Characterization of  
985 polyploid wheat genomic diversity using a high-density 90 000 single nucleotide  
986 polymorphism array. *Plant Biotechnology Journal* 12 (6):787-796.
- 987 Wang, Y., K. VandenLangenberg, T.C. Wehner, P.A.G. Kraan, J. Suelmann et al., 2016 QTL  
988 mapping for downy mildew resistance in cucumber inbred line WI7120 (PI 330628).  
989 *Theoretical and Applied Genetics* 129 (8):1493-1505.
- 990 Wolf, J.B., L.J. Leamy, E.J. Routman, and J.M. Cheverud, 2005 Epistatic pleiotropy and the  
991 genetic architecture of covariation within early and late-developing skull trait complexes  
992 in mice. *Genetics* 171 (2):683-694.
- 993 Wolf, J.B., D. Pomp, E.J. Eisen, J.M. Cheverud, and L.J. Leamy, 2006 The contribution of  
994 epistatic pleiotropy to the genetic architecture of covariation among polygenic traits in  
995 mice. *Evolution & Development* 8 (5):468-476.

- 996 Wu, Y., P.R. Bhat, T.J. Close, and S. Lonardi, 2008 Efficient and Accurate Construction of  
997 Genetic Linkage Maps from the Minimum Spanning Tree of a Graph. *PLOS Genetics* 4  
998 (10):e1000212.
- 999 Xing, W., H.W. Zhao, and D.T. Zou, 2014 Detection of main-effect and epistatic QTL for yield-  
1000 related traits in rice under drought stress and normal conditions. *Canadian Journal of*  
1001 *Plant Science* 94 (4):633-641.
- 1002 Xing, Y.Z., Y.F. Tan, J.P. Hua, X.L. Sun, C.G. Xu et al., 2002 Characterization of the main  
1003 effects, epistatic effects and their environmental interactions of QTLs on the genetic basis  
1004 of yield traits in rice. *Theoretical and Applied Genetics* 105 (2-3):248-257.
- 1005 Yu, S.B., J.X. Li, Y.F. Tan, Y.J. Gao, X.H. Li et al., 1997 Importance of epistasis as the genetic  
1006 basis of heterosis in an elite rice hybrid. *Proceedings of the National Academy of*  
1007 *Sciences of the United States of America* 94 (17):9226-9231.
- 1008 Zanetti, S., M. Winzeler, C. Feuillet, B. Keller, and M. Messmer, 2001 Genetic analysis of  
1009 bread-making quality in wheat and spelt. *Plant Breeding* 120 (1):13-19.
- 1010 Zhang, Y.L., Y.P. Wu, Y.G. Xiao, J. Yan, Y. Zhang et al., 2009 QTL mapping for milling,  
1011 gluten quality, and flour pasting properties in a recombinant inbred line population  
1012 derived from a Chinese soft x hard wheat cross. *Crop & Pasture Science* 60 (6):587-597.

- 1013 Zhao, L.A., K.P. Zhang, B. Liu, Z.Y. Deng, H.L. Qu et al., 2010 A comparison of grain protein  
1014 content QTLs and flour protein content QTLs across environments in cultivated wheat.  
1015 *Euphytica* 174 (3):325-335.

**Table 1** Description of the environments and planting date to evaluate spring wheat end-use quality traits in a recombinant inbred lines (RIL) population derived from a cross between Glenn and Traverse (NDAWN, 2000-2016).

| Location   | Year | LAT <sup>a</sup> | LNG <sup>b</sup> | ALT<br>(m) <sup>c</sup> | Planting date | TGS<br>(°C) <sup>d</sup> | PGS<br>(mm) <sup>e</sup> |
|------------|------|------------------|------------------|-------------------------|---------------|--------------------------|--------------------------|
| Prosper    | 2012 | 46°57'46.90"N    | 97°1'11.31"W     | 275                     | 05.15.2012    | 21                       | 148.8                    |
| Carrington | 2012 | 47°27'11.56"N    | 99°9'15.15"W     | 491                     | 04.23.2012    | 19                       | 225.0                    |
| Casselton  | 2012 | 46°51'18.26"N    | 97°12'39.83"W    | 283                     | 05.10.2012    | 21                       | 144.0                    |
| Prosper    | 2013 | 46°57'46.90"N    | 97°1'11.31"W     | 275                     | 05.30.2013    | 20                       | 318.0                    |
| Carrington | 2013 | 47°27'11.56"N    | 99°9'15.15"W     | 491                     | 04.30.2013    | 18                       | 83.2                     |
| Minot      | 2013 | 48°13'58.68"N    | 101°17'32.25"W   | 514                     | 05.14.2013    | 19                       | 425.0                    |
| Prosper    | 2014 | 46°57'46.90"N    | 97°1'11.31"W     | 275                     | 05.24.2014    | 19                       | 216.9                    |
| Carrington | 2014 | 47°27'11.56"N    | 99°9'15.15"W     | 491                     | 05.02.2014    | 17                       | 203.2                    |
| Minot      | 2014 | 48°13'58.68"N    | 101°17'32.25"W   | 514                     | 05.22.2014    | 17                       | 347.7                    |

<sup>a</sup>Latitude in degrees and minutes; <sup>b</sup>Longitude in degrees and minutes; <sup>c</sup>Altitude in meters; <sup>d</sup>Mean temperature during growing season in degrees Celsius (May-October); <sup>e</sup>Mean precipitation in growing season in millimeters.

**Table 2** Phenotypic performance of Glenn, Traverse and their recombinant inbred lines (RILs) based on average / BLUP values and broad-sense heritability ( $H^2$ ) for end-use quality traits across all environments.

| Trait <sup>a</sup> | Parental lines             |                | RIL population |                   |                    |                             |                 | Class of trait $H^2$ <sup>g</sup> |
|--------------------|----------------------------|----------------|----------------|-------------------|--------------------|-----------------------------|-----------------|-----------------------------------|
|                    | Glenn                      | Traverse       | Mean           | S.D. <sup>c</sup> | Range <sup>d</sup> | Q <sub>2</sub> <sup>e</sup> | H <sup>2f</sup> |                                   |
| GPC                | 15.76 /0.51 <sup>*b</sup>  | 14.49 /-0.76   | 15.25 /0.00    | 0.50              | -1.12 to 1.52      | -0.02                       | 0.29            | L                                 |
| BMT                | 4.08 /0.98 <sup>*</sup>    | 2.68 /-0.42    | 3.10 /-0.03    | 0.26              | -0.53 to 0.76      | -0.01                       | 0.65            | HI                                |
| BA                 | 62.44 /1.42 <sup>*</sup>   | 60.33 /-0.69   | 61.02 /-0.02   | 0.75              | -1.44 to 2.93      | -0.09                       | 0.4             | M                                 |
| BLV                | 200.83 /6.37 <sup>*</sup>  | 185.86 /-8.6   | 194.46 /-0.13  | 4.67              | -10.56 to 17.77    | -0.26                       | 0.26            | L                                 |
| CBCL               | 7.68 /-0.01                | 7.65 /-0.04    | 7.69 /0.01     | 0.12              | -0.40 to 0.28      | 0.02                        | 0.11            | L                                 |
| CTCL               | 9.63 /-0.01                | 9.53 /-0.11    | 9.64 /0.00     | 0.04              | -0.11 to 0.06      | 0.01                        | 0.05            | L                                 |
| FE                 | 53.51 /0.87                | 54.07 /1.43    | 52.64 /-0.01   | 1.21              | -2.91 to 2.89      | 0.07                        | 0.55            | HI                                |
| MIXOPA             | 6.22 /2.93 <sup>*</sup>    | 2.19 /-1.1     | 3.29 /-0.04    | 0.39              | -1.19 to 0.82      | -0.05                       | 0.42            | M                                 |
| MELS               | 23.68 /-0.40 <sup>*</sup>  | 23.70 /-0.38   | 24.08 /0.19    | 2.40              | -4.64 to 7.18      | -0.25                       | 0.38            | M                                 |
| MERS               | -10.07 /0.24               | -12.44 /-2.13  | -10.31 /-0.08  | 1.21              | -3.45 to 2.35      | 0.01                        | 0.5             | HI                                |
| MMLPT              | 5.68 /1.53 <sup>*</sup>    | 3.10 /-1.05    | 4.15 /-0.05    | 0.70              | -1.53 to 2.08      | -0.09                       | 0.77            | VH                                |
| MMLPV              | 60.45 /1.73                | 55.94 /-2.78   | 58.72 /0.05    | 1.85              | -6.82 to 5.50      | 0.16                        | 0.31            | M                                 |
| MMLTV              | 56.72 /4.23 <sup>*</sup>   | 45.63 /-6.86   | 52.49 /-0.06   | 2.38              | -6.52 to 6.48      | -0.47                       | 0.41            | M                                 |
| MMLPW              | 20.79 /2.81 <sup>*</sup>   | 15.93 /-2.05   | 17.98 /-0.01   | 0.96              | -2.18 to 2.19      | -0.12                       | 0.23            | L                                 |
| MMLPI              | 185.17 /43.41 <sup>*</sup> | 114.29 /-27.47 | 141.76 /-0.61  | 13.7              | -30.86 to 35.98    | -0.77                       | 0.43            | M                                 |
| DO                 | 8.88 /-0.35                | 8.71 /-0.52    | 9.23 /0.01     | 0.16              | -0.44 to 0.27      | 0.01                        | 0.22            | L                                 |

<sup>a</sup>GPC: grain protein content, BMT: bake mixing time, BA: baking absorption, BLV: bread loaf volume, CBCL: crumb color, CTCL: crust color, FE: flour extraction rate, MIXOPA: the general mixograph pattern, MELS: mixograph envelope left slope, MERS: mixograph envelope right slope, MMLPT: mixograph MID line peak time, MMLPV: mixograph MID line peak value, MMLTV: mixograph MID line time \* value, MMLPW: mixograph MID line peak width, MMLPI: mixograph MID line peak integral; DO: dough character; <sup>b</sup>\* A significant difference between parental lines at  $P < 0.05$ ; <sup>c</sup> Standard deviation; <sup>d</sup> Range is estimated based on BLUP values; <sup>e</sup> The second quartile or median; <sup>f</sup> broad-sense heritability coefficient according to Holland (2006); <sup>g</sup> Class of broad-sense heritability according to Hallauer and Miranda (1988), VH = very high =  $H^2 > 0.70$ , HI = high =  $0.50 < H^2 < 0.70$ , M = medium =  $0.30 < H^2 < 0.50$ , L = low =  $H^2 < 0.30$ .

**Table 3** Genetic and Pearson's rank correlations of end-use quality traits for the recombinant inbred lines (RILs) population derived from a cross between Glenn and Traverse across all environments. Values in bold displayed above the diagonal indicate genetic correlation coefficients, and values under the diagonal show Pearson correlation coefficients.

| Trait <sup>a</sup> | GPC                  | BMT                        | BA            | BLV            | CBCL          | CTCL          | FE             | MIXOPA        | MELS           | MERS           | MMLPT          | MMLPV          | MMLTV          | MMLPW          | MMLPI          | DO             |
|--------------------|----------------------|----------------------------|---------------|----------------|---------------|---------------|----------------|---------------|----------------|----------------|----------------|----------------|----------------|----------------|----------------|----------------|
| GPC                | -                    | <b>-0.29**<sup>c</sup></b> | <b>0.42**</b> | <b>0.76**</b>  | <b>0.18</b>   | <b>0.48**</b> | <b>-0.31**</b> | <b>0.25**</b> | <b>0.70**</b>  | <b>-0.49**</b> | <b>-0.35**</b> | <b>0.74**</b>  | <b>0.34**</b>  | <b>0.40**</b>  | <b>0.11</b>    | <b>0.10</b>    |
| BMT                | -0.29** <sup>b</sup> | -                          | <b>-0.17</b>  | <b>-0.29**</b> | <b>-0.05</b>  | <b>0.27**</b> | <b>-0.02</b>   | <b>0.73**</b> | <b>-0.60**</b> | <b>0.69**</b>  | <b>0.90**</b>  | <b>-0.11</b>   | <b>0.69**</b>  | <b>0.50**</b>  | <b>0.89**</b>  | <b>0.27**</b>  |
| BA                 | 0.33**               | -0.12                      | -             | <b>0.22*</b>   | <b>0.21*</b>  | <b>0.14</b>   | <b>-0.53**</b> | <b>0.31**</b> | <b>0.61**</b>  | <b>-0.36**</b> | <b>-0.46**</b> | <b>0.80**</b>  | <b>0.37**</b>  | <b>0.32**</b>  | <b>0.01</b>    | <b>0.07</b>    |
| BLV                | 0.59**               | -0.24**                    | 0.16          | -              | <b>0.29**</b> | <b>0.97**</b> | <b>-0.08</b>   | <b>0.43**</b> | <b>0.76</b>    | <b>-0.37**</b> | <b>-0.22*</b>  | <b>0.70**</b>  | <b>0.38**</b>  | <b>0.48**</b>  | <b>0.24**</b>  | <b>0.01</b>    |
| CBCL               | 0.13                 | -0.06                      | 0.10          | 0.23**         | -             | <b>0.39**</b> | <b>-0.41**</b> | <b>0.10</b>   | <b>0.24**</b>  | <b>0.13</b>    | <b>-0.05</b>   | <b>0.08</b>    | <b>0.10</b>    | <b>-0.03</b>   | <b>0.13</b>    | <b>-0.30**</b> |
| CTCL               | 0.21*                | 0.06                       | 0.06          | 0.34**         | 0.07          | -             | <b>-0.49**</b> | <b>0.65**</b> | <b>0.48**</b>  | <b>0.10</b>    | <b>0.16</b>    | <b>0.62**</b>  | <b>0.71**</b>  | <b>0.71**</b>  | <b>0.65**</b>  | <b>-0.65**</b> |
| FE                 | -0.24**              | -0.04                      | -0.36**       | -0.05          | -0.20*        | -0.16         | -              | <b>-0.20*</b> | <b>-0.18</b>   | <b>-0.02</b>   | <b>0.07</b>    | <b>-0.25**</b> | <b>-0.25**</b> | <b>-0.35**</b> | <b>-0.16</b>   | <b>-0.13</b>   |
| MIXOPA             | 0.24**               | 0.57**                     | 0.22*         | 0.30**         | 0.07          | 0.37**        | -0.14          | -             | <b>-0.13</b>   | <b>0.58**</b>  | <b>0.58**</b>  | <b>0.45**</b>  | <b>0.97**</b>  | <b>0.83**</b>  | <b>0.92**</b>  | <b>0.08</b>    |
| MELS               | 0.57**               | -0.48**                    | 0.41**        | 0.46**         | 0.14          | 0.17          | -0.11          | 0.01          | -              | <b>-0.87**</b> | <b>-0.79**</b> | <b>0.79**</b>  | <b>-0.03</b>   | <b>0.09</b>    | <b>-0.43**</b> | <b>0.03</b>    |
| MERS               | -0.48**              | 0.55**                     | -0.27**       | -0.26**        | 0.01          | 0.02          | -0.03          | 0.25**        | -0.67**        | -              | <b>0.83**</b>  | <b>-0.67**</b> | <b>0.33**</b>  | <b>0.16</b>    | <b>0.61**</b>  | <b>-0.02</b>   |
| MMLPT              | -0.35**              | 0.85**                     | -0.39**       | -0.19*         | -0.06         | 0.05          | 0.04           | 0.44**        | -0.64**        | 0.68**         | -              | <b>-0.48**</b> | <b>0.45**</b>  | <b>0.36**</b>  | <b>0.97**</b>  | <b>0.24**</b>  |
| MMLPV              | 0.62**               | -0.11                      | 0.48**        | 0.39**         | 0.01          | 0.30**        | -0.14          | 0.42**        | 0.61**         | -0.54**        | -0.31**        | -              | <b>0.49**</b>  | <b>0.83**</b>  | <b>-0.03</b>   | <b>-0.21*</b>  |
| MMLTV              | 0.33**               | 0.48**                     | 0.26**        | 0.24**         | 0.02          | 0.33**        | -0.17          | 0.79**        | 0.08           | 0.11           | 0.36**         | 0.67**         | -              | <b>0.96**</b>  | <b>0.80**</b>  | <b>0.11</b>    |
| MMLPW              | 0.35**               | 0.31**                     | 0.20*         | 0.27**         | 0.02          | 0.35**        | -0.19*         | 0.66**        | 0.13           | -0.04          | 0.18*          | 0.60**         | 0.71**         | -              | <b>0.71**</b>  | <b>-0.17</b>   |
| MMLPI              | 0.04                 | 0.67**                     | 0.03          | 0.10           | 0.04          | 0.14          | -0.17          | 0.62**        | -0.29**        | 0.41**         | 0.75**         | 0.01           | 0.53**         | 0.34**         | -              | <b>0.56**</b>  |
| DO                 | 0.13                 | 0.09                       | 0.02          | 0.03           | -0.03         | -0.09         | -0.04          | 0.11          | 0.05           | -0.11          | 0.14           | 0.05           | 0.15           | 0.04           | 0.24**         | -              |

<sup>a</sup> GPC: grain protein content, BMT: bake mixing time, BA: baking absorption, BLV: bread loaf volume, CBCL: crumb color, CTCL: crust color, FE: flour extraction rate, MIXOPA: the general mixograph pattern, MELS: mixograph envelope left slope, MERS: mixograph envelope right slope, MMLPT: mixograph MID line peak time, MMLPV: mixograph MID line peak value, MMLTV: mixograph MID line time \* value, MMLPW: mixograph MID line peak width, MMLPI: mixograph MID line peak integral; DO: dough character; <sup>b</sup> Genetic correlation coefficient according to Holland (2002); <sup>c</sup> Pearson correlation based on BLUP values. \* and \*\* Significant at  $P < 0.05$  and  $0.01$ , respectively; <sup>ns</sup> not significant at  $P < 0.05$ .

**Table 4** Distribution of markers and marker density across linkage groups in the bread wheat (*Triticum aestivum* L.) genetic map developed by using the recombinant inbred line (RIL) population of a cross between Glenn (PI-639273) and Traverse (PI-642780).

| Linkage group | No. of markers | No. of unique loci | Map distance (cM) | Map density (cM/marker) | Map density (cM/locus) |
|---------------|----------------|--------------------|-------------------|-------------------------|------------------------|
| 1A1           | 345            | 70                 | 131.08            | 0.38                    | 1.87                   |
| 1A2           | 108            | 24                 | 30.79             | 0.29                    | 1.28                   |
| 2A1           | 215            | 74                 | 142.28            | 0.66                    | 1.92                   |
| 2A2           | 52             | 11                 | 14.30             | 0.28                    | 1.30                   |
| 3A1           | 221            | 41                 | 87.52             | 0.40                    | 2.13                   |
| 3A2           | 91             | 18                 | 60.99             | 0.67                    | 3.39                   |
| 4A1           | 278            | 57                 | 150.56            | 0.54                    | 2.64                   |
| 5A1           | 78             | 21                 | 80.58             | 1.03                    | 3.84                   |
| 5A2           | 197            | 42                 | 59.79             | 0.30                    | 1.42                   |
| 5A3           | 29             | 14                 | 32.84             | 1.13                    | 2.35                   |
| 6A1           | 173            | 33                 | 72.94             | 0.42                    | 2.21                   |
| 6A2           | 173            | 23                 | 16.24             | 0.09                    | 0.71                   |
| 7A1           | 525            | 113                | 196.80            | 0.37                    | 1.74                   |
| 7A2           | 64             | 18                 | 17.14             | 0.27                    | 0.95                   |
| 1B1           | 529            | 58                 | 68.48             | 0.13                    | 1.18                   |
| 1B2           | 10             | 5                  | 19.69             | 1.97                    | 3.94                   |
| 1B3           | 43             | 10                 | 11.10             | 0.26                    | 1.11                   |
| 2B1           | 461            | 54                 | 40.33             | 0.09                    | 0.75                   |
| 2B2           | 614            | 106                | 181.12            | 0.29                    | 1.71                   |
| 3B1           | 770            | 70                 | 77.38             | 0.10                    | 1.11                   |
| 3B2           | 78             | 21                 | 31.31             | 0.40                    | 1.49                   |
| 3B3           | 27             | 9                  | 16.27             | 0.60                    | 1.81                   |
| 3B4           | 103            | 29                 | 18.45             | 0.18                    | 0.64                   |
| 4B1           | 273            | 58                 | 111.08            | 0.41                    | 1.92                   |
| 5B1           | 395            | 88                 | 241.74            | 0.61                    | 2.75                   |
| 6B1           | 794            | 103                | 144.16            | 0.18                    | 1.40                   |
| 6B2           | 104            | 22                 | 73.09             | 0.70                    | 3.32                   |
| 7B1           | 555            | 88                 | 134.67            | 0.24                    | 1.53                   |
| 7B2           | 51             | 14                 | 11.12             | 0.22                    | 0.79                   |
| 1D1           | 111            | 24                 | 78.26             | 0.71                    | 3.26                   |
| 2D1           | 131            | 7                  | 13.48             | 0.10                    | 1.93                   |
| 2D2           | 47             | 16                 | 14.09             | 0.30                    | 0.88                   |
| 2D3           | 11             | 10                 | 22.03             | 2.00                    | 2.20                   |
| 3D1           | 33             | 2                  | 9.62              | 0.29                    | 4.81                   |
| 4D1           | 17             | 7                  | 6.21              | 0.37                    | 0.89                   |
| 5D1           | 118            | 12                 | 21.32             | 0.18                    | 1.78                   |
| 6D1           | 40             | 14                 | 73.50             | 1.84                    | 5.25                   |
| 6D2           | 31             | 10                 | 10.75             | 0.35                    | 1.08                   |
| 7D1           | 31             | 14                 | 35.44             | 1.14                    | 2.53                   |
| 7D2           | 22             | 5                  | 9.89              | 0.45                    | 1.98                   |
| 7D3           | 15             | 12                 | 76.40             | 5.09                    | 6.37                   |
| A genome      | 2549           | 559                | 1093.86           | 0.43                    | 1.96                   |
| B genome      | 4807           | 735                | 1179.99           | 0.25                    | 1.61                   |
| D genome      | 607            | 133                | 370.97            | 0.61                    | 2.79                   |
| Whole genome  | 7963           | 1427               | 2644.82           | 0.33                    | 1.85                   |

**Table 5** QTL detected for end-use quality traits in a bread wheat (*Triticum aestivum* L.) RIL population derived from a cross between Glenn (PI-639273) and Traverse (PI-642780).

| Trait <sup>a</sup> | A-QTL name <sup>b</sup>    | Other associated traits | Env. <sup>c</sup>                | Chromosome/linkage group | Left marker              | Right marker             | Position (cM) <sup>d</sup> | LOD <sup>e</sup> | Additive effect <sup>f</sup> | PV(%) <sup>g</sup> | Confidence intervals | Previously identified A-QTL in the same chromosome region |
|--------------------|----------------------------|-------------------------|----------------------------------|--------------------------|--------------------------|--------------------------|----------------------------|------------------|------------------------------|--------------------|----------------------|-----------------------------------------------------------|
| FE                 | <i>AQ.FE.ndsu.1A.1</i>     | -                       | I, X                             | 1A1                      | BS00084022_51            | RAC875_c9700_989         | 50                         | 8.7788           | -0.4935                      | 14.4911            | 48.5-50.5            | -                                                         |
| FE                 | <i>AQ.FE.ndsu.1A.2</i>     | GPC                     | VII                              | 1A1                      | w SNP_Ra_c15564_23999084 | w SNP_BG263358A_Ta_2_3   | 94                         | 7.6547           | -1.061                       | 19.4012            | 92.5-95.5            | -                                                         |
| GPC                | <i>AQ.GPC.ndsu.1A</i>      | FE                      | III, V, VIII, VIII               | 1A1                      | w SNP_Ra_c15564_23999084 | w SNP_BG263358A_Ta_2_3   | 95                         | 4.6476           | 0.2376                       | 13.6941            | 93.5-96.5            | -                                                         |
| BMT                | <i>AQ.BMT.ndsu.1B</i>      | MMLPI                   | IV, VIII, VIII                   | 1B1                      | TA015141-0717            | w SNP_JD_c4444_5575748   | 13                         | 4.7945           | 0.1736                       | 12.9075            | 12.5-13.5            | -                                                         |
| BMT                | <i>AQ.BMT.ndsu.1B.1</i>    | -                       | VI, X                            | 1B1                      | Kukri_c33561_564         | w SNP_Ku_c16938_25916260 | 14                         | 13.6184          | 0.1303                       | 12.085             | 13.5-14.5            | -                                                         |
| BMT                | <i>AQ.BMT.ndsu.1B.2</i>    | MMLPT                   | I, V                             | 1B1                      | RAC875_c75885_302        | Tdurum_contig28305_106   | 20                         | 6.5489           | 0.1804                       | 12.5043            | 19.5-20.5            | -                                                         |
| GPC                | <i>AQ.GPC.ndsu.1B.1</i>    | MIXOPA                  | VII                              | 1B1                      | BS00064162_51            | Excalibur_rep_c101787_89 | 57                         | 3.9039           | 0.2683                       | 8.1766             | 56.5-58.5            | -                                                         |
| MIXOPA             | <i>AQ.MIXOPA.ndsu.1B.1</i> | GPC                     | IV                               | 1B1                      | BS00064162_51            | Excalibur_rep_c101787_89 | 57                         | 3.9039           | 0.2683                       | 7.7358             | 56.5-58.5            | -                                                         |
| MMLPI              | <i>AQ.MMLPI.ndsu.1B.1</i>  | BMT                     | VI, VIII, X                      | 1B1                      | TA015141-0717            | w SNP_JD_c4444_5575748   | 13                         | 7.5203           | 10.7587                      | 15.9048            | 12.5-13.5            | -                                                         |
| MMLPI              | <i>AQ.MMLPI.ndsu.1B.2</i>  | MMLPT; MMLTV; BMT       | IV                               | 1B1                      | RAC875_c75885_302        | Tdurum_contig28305_106   | 20                         | 14.3296          | 33.5754                      | 16.6441            | 19.5-20.5            | -                                                         |
| MMLPT              | <i>AQ.MMLPT.ndsu.1B</i>    | BMT                     | I, IV, V, VI, VII, VIII, VIII, X | 1B1                      | RAC875_c75885_302        | Tdurum_contig28305_106   | 20                         | 15.2002          | 0.3698                       | 24.4267            | 19.5-20.5            | Jin et al. 2016                                           |
| MMLPW              | <i>AQ.MMLPW.ndsu.1B</i>    | -                       | V, X                             | 1B1                      | w SNP_Ex_c2569_4780450   | Tdurum_contig65853_534   | 62                         | 4.6175           | 0.3643                       | 11.4578            | 60.5-65.5            | -                                                         |
| MMLTV              | <i>AQ.MMLTV.ndsu.1B</i>    | MMLPI; MMLPT; BMT       | IV                               | 1B1                      | RAC875_c75885_302        | Tdurum_contig28305_106   | 20                         | 4.3062           | 12.1355                      | 1.6784             | 19.5-20.5            | -                                                         |
| BA                 | <i>AQ.BA.ndsu.1B</i>       | -                       | I, IV, VIII, III                 | 1B3                      | BS00093275_51            | BobWhite_c12960_138      | 0                          | 3.6756           | -0.4042                      | 8.1774             | 0-2.5                | Tsilo et al. 2011                                         |
| BMT                | <i>AQ.BMT.ndsu.1D</i>      | -                       | VIII, X                          | 1D1                      | RAC875_rep_c105196_532   | BS00038418_51            | 76                         | 25.0366          | 0.1984                       | 27.7923            | 74.5-76.5            | -                                                         |
| BMT                | <i>AQ.BMT.ndsu.2A.1</i>    | GPC                     | I                                | 2A1                      | Excalibur_c27279_699     | Kukri_c44255_832         | 37                         | 8.2391           | -0.204                       | 12.8403            | 34.5-38.5            | -                                                         |
| FE                 | <i>AQ.FE.ndsu.2A.1</i>     | MMLPT                   | V                                | 2A1                      | BS00022903_51            | Ra_c34214_1320           | 20                         | 7.9438           | 0.8736                       | 10.3544            | 19.5-22.5            | -                                                         |
| GPC                | <i>AQ.GPC.ndsu.2A.1</i>    | BMT                     | IV, V                            | 2A1                      | Kukri_c44255_832         | RAC875_c13861_1248       | 38                         | 6.2687           | 0.4351                       | 13.19              | 37.5-39.5            | -                                                         |
| GPC                | <i>AQ.GPC.ndsu.2A.2</i>    | MMLPT                   | III, X                           | 2A1                      | w SNP_Ex_c28204_37349164 | Kukri_c77188_798         | 18                         | 4.939            | 0.1596                       | 8.0024             | 17.5-19.5            | -                                                         |
| MMLPT              | <i>AQ.MMLPT.ndsu.2A.1</i>  | GPC                     | I, III                           | 2A1                      | w SNP_Ex_c28204_37349164 | Kukri_c77188_798         | 18                         | 5.2543           | -0.5361                      | 16.3459            | 17.5-19.5            | -                                                         |
| MMLPT              | <i>AQ.MMLPT.ndsu.2A.2</i>  | FE                      | III                              | 2A1                      | BS00022903_51            | Ra_c34214_1320           | 20                         | 7.9438           | 0.8736                       | 10.0223            | 19.5-22.5            | -                                                         |

<sup>a</sup> GPC: grain protein content, BMT: bake mixing time, BA: baking absorption, BLV: bread loaf volume, CBCL: crumb color, CTCL: crust color, FE: flour extraction rate, MIXOPA: the general mixograph pattern, MELS: mixograph envelope left slope, MERS: mixograph envelope right slope, MMLPT: mixograph MID line peak time, MMLPV: mixograph MID line peak value, MMLTV: mixograph MID line time \* value, MMLPW: mixograph MID line peak width, MMLPI: mixograph MID line peak integral, DO: dough character; <sup>b</sup> I: Prosper 2012, II: Carrington 2012, III: Casselton 20012, IV: Prosper 2013, V: Carrington 2013, VI: Minot 2013, VII: Prosper 2014, VIII: Carrington 2014, VIII: Minot 2014, X: BLUP values across all locations; <sup>c</sup> centimorgan; <sup>d</sup> Log of the Odds; <sup>e</sup> Phenotypic variation.



**Table 5** QTL detected for end-use quality traits in a bread wheat (*Triticum aestivum* L.) RIL population derived from a cross between Glenn (PI-639273) and Traverse (PI-642780) (continued).

| Trait <sup>a</sup> | A-QTL name <sup>b</sup>   | Other associated traits | Env. <sup>c</sup> | Chromosome/linkage group | Left marker               | Right marker            | Position (cM) <sup>d</sup> | LOD <sup>e</sup> | Additive effect <sup>f</sup> | PV(%) <sup>g</sup> | Confidence intervals | Previously identified A-QTL in the same chromosome region |
|--------------------|---------------------------|-------------------------|-------------------|--------------------------|---------------------------|-------------------------|----------------------------|------------------|------------------------------|--------------------|----------------------|-----------------------------------------------------------|
| GPC                | <i>AQ.GPC.ndsu.2B</i>     | -                       | I, III            | 2B2                      | BS00064658_51             | RAC875_c1755_971        | 27                         | 4.6386           | -0.1599                      | 8.7567             | 23.5-27.5            | -                                                         |
| BLV                | <i>AQ.BLV.ndsu.2D.1</i>   | -                       | II, X, III        | 2D2                      | Kukri_c31121_1460         | Kukri_c44769_750        | 7                          | 3.8365           | 4.4342                       | 9.7413             | 5.5-8.5              | -                                                         |
| BLV                | <i>AQ.BLV.ndsu.2D.2</i>   | -                       | VII, VIII         | 2D2                      | BobWhite_c6365_965        | D_GDS7LZN02FDZX8_269    | 4                          | 3.6217           | 8.5516                       | 12.8348            | 3.5-4.5              | Tsilo et al. 2011                                         |
| MMLPT              | <i>AQ.MMLPT.ndsu.2D</i>   | -                       | II, IV, VII, X    | 2D3                      | BS00011109_51             | wsnp_Ku_c8712_14751858  | 20                         | 4.3893           | -0.1918                      | 6.5246             | 13.5-22              | -                                                         |
| BMT                | <i>AQ.BMT.ndsu.3A</i>     | MMLPT                   | I, V, VIII, X     | 3A2                      | BobWhite_c38444_238       | Kukri_c10751_1031       | 47                         | 12.0827          | 0.1218                       | 10.2537            | 46.5-48.5            | -                                                         |
| GPC                | <i>AQ.GPC.ndsu.3A</i>     | -                       | III, V, X         | 3A2                      | BS00022058_51             | Excalibur_c39808_453    | 26                         | 5.9339           | -0.334                       | 9.3796             | 21.5-28.5            | -                                                         |
| MMLPT              | <i>AQ.MMLPT.ndsu.3A.1</i> | BMT                     | IV, VIII, X       | 3A2                      | Kukri_c10751_1031         | wsnp_Ex_c1533_2930233   | 49                         | 6.8915           | 0.2345                       | 9.5047             | 47.5-51.5            | -                                                         |
| GPC                | <i>AQ.GPC.ndsu.3B.1</i>   | MMLPV                   | X                 | 3B1                      | wsnp_Ex_c47078_52393295   | D_GB5Y7FA01EIDVZ_263    | 25                         | 7.5082           | 0.206                        | 13.0023            | 22.5-27.5            | -                                                         |
| MMLPV              | <i>AQ.MMLPV.ndsu.3B.1</i> | GPC                     | VIII              | 3B1                      | RFL_Contig1456_842        | wsnp_Ex_c47078_52393295 | 24                         | 5.3548           | 2.4546                       | 7.5943             | 22.5-27.5            | -                                                         |
| FE                 | <i>AQ.FE.ndsu.3B</i>      | -                       | I, V, VII, X      | 3B1                      | Tdurum_contig82214_79     | wsnp_BE499016B_Ta_2_1   | 68                         | 8.5226           | -0.5046                      | 15.2959            | 64.5-69.5            | Carter et al. 2012                                        |
| BMT                | <i>AQ.BMT.ndsu.3B.1</i>   | -                       | II, V, X          | 3B2                      | Tdurum_contig12455_385    | Excalibur_c21708_555    | 0                          | 4.9225           | 0.0716                       | 3.5988             | 0-0.5                | -                                                         |
| BMT                | <i>AQ.BMT.ndsu.3B.2</i>   | MMLPI; MMLTV            | I, VIII           | 3B2                      | Excalibur_rep_c102270_677 | Kukri_c2227_583         | 6                          | 7.7153           | 0.1939                       | 11.5294            | 5.5-6.5              | -                                                         |
| MMLPI              | <i>AQ.MMLPT.ndsu.3B.2</i> | BMT; MMLTV;             | IV                | 3B2                      | Excalibur_rep_c102270_677 | Kukri_c2227_583         | 6                          | 4.9406           | 8.976                        | 9.6693             | 5.5-6.5              | -                                                         |
| MMLPT              | <i>AQ.MMLPT.ndsu.3B.2</i> | -                       | IV, VI, VIII, X   | 3B2                      | Tdurum_contig15928_135    | BobWhite_c9424_243      | 5                          | 3.8931           | 0.1712                       | 5.1946             | 4.5-5.5              | -                                                         |
| MMLTV              | <i>AQ.MMLTV.ndsu.3B.2</i> | BMT; MMLTV;             | V                 | 3B2                      | Excalibur_rep_c102270_677 | Kukri_c2227_583         | 6                          | 3.4132           | 2.3331                       | 9.894              | 5.5-6.5              | -                                                         |
| BA                 | <i>AQ.BA.ndsu.4A</i>      | FE; MMLTV               | IV, VI, X         | 4A1                      | BS00022395_51             | BS00021957_51           | 147                        | 6.6931           | 0.2547                       | 11.552             | 144.5-148.5          | Jin et al. 2016                                           |
| MMLPV              | <i>AQ.MMLPV.ndsu.4A</i>   | -                       | VII, X            | 4A1                      | TA004912-0408             | Kukri_c17417_797        | 150                        | 5.821            | 0.8158                       | 13.7424            | 149.5-150            | -                                                         |
| MMLTV              | <i>AQ.MMLTV.ndsu.4A</i>   | FE; BA                  | IV, V, X          | 4A1                      | Kukri_c35451_857          | BS00022395_51           | 143                        | 3.5732           | 0.7363                       | 7.8228             | 141.5-145.5          | -                                                         |
| FE                 | <i>AQ.FE.ndsu.4A.1</i>    | MMLTV:BA                | X                 | 4A1                      | Kukri_c18346_556          | Kukri_c35451_857        | 142                        | 4.5021           | -0.3776                      | 6.9089             | 141.5-144.5          | -                                                         |
| BLV                | <i>AQ.BLV.ndsu.4B.1</i>   | BMT                     | VI, X             | 4B1                      | RAC875_c39339_400         | RAC875_c17026_714       | 97                         | 4.0885           | -1.3594                      | 7.4436             | 94.5-97.5            | -                                                         |
| BMT                | <i>AQ.BMT.ndsu.4B.1</i>   | BLV                     | III, X            | 4B1                      | RAC875_c39339_400         | RAC875_c17026_714       | 97                         | 4.0885           | -1.3594                      | 6.7181             | 94.5-97.5            | -                                                         |

<sup>a</sup> GPC: grain protein content, BMT: bake mixing time, BA: baking absorption, BLV: bread loaf volume, CBCL: crumb color, CTCL: crust color, FE: flour extraction rate, MIXOPA: the general mixograph pattern, MELS: mixograph envelope left slope, MERS: mixograph envelope right slope, MMLPT: mixograph MID line peak time, MMLPV: mixograph MID line peak value, MMLTV: mixograph MID line time \* value, MMLPW: mixograph MID line peak width, MMLPI: mixograph MID line peak integral, DO: dough character; <sup>b</sup> I: Prosper 2012, II: Carrington 2012, III: Casselton 20012, IV: Prosper 2013, V: Carrington 2013, VI: Minot 2013, VII: Prosper 2014, VIII: Carrington 2014, VIII: Minot 2014, X: BLUP values across all locations; <sup>c</sup> centimorgan; <sup>d</sup> Log of the Odds; <sup>e</sup> Phenotypic variation.

**Table 5** QTL detected for end-use quality traits in a bread wheat (*Triticum aestivum* L.) RIL population derived from a cross between Glenn (PI-639273) and Traverse (PI-642780) (continued).

| Trait <sup>a</sup> | A-QTL name <sup>b</sup>    | Other associated traits | Env. <sup>c</sup>          | Chromosome/linkage group | Left marker                 | Right marker            | Position (cM) <sup>d</sup> | LOD <sup>e</sup> | Additive effect <sup>f</sup> | PV(%) <sup>g</sup> | Confidence interval | Previously identified A-QTL in the same chromosome region |
|--------------------|----------------------------|-------------------------|----------------------------|--------------------------|-----------------------------|-------------------------|----------------------------|------------------|------------------------------|--------------------|---------------------|-----------------------------------------------------------|
| GPC                | <i>AQ.GPC.ndsu.4B1</i>     | -                       | I, II                      | 4B1                      | BobWhite_c47144_153         | Tdurum_contig10302_187  | 94                         | 6.6325           | -0.2086                      | 15.0008            | 93.5-94.5           | -                                                         |
| BA                 | <i>AQ.BA.ndsu.4B.1</i>     | MIXOPA                  | V                          | 4B1                      | Excalibur_c39876_403        | Kukri_c19909_733        | 70                         | 4.7301           | -0.6243                      | 11.2395            | 69.5-73.5           | -                                                         |
| MIXOPA             | <i>AQ.MIXOPA.ndsu.1B.1</i> | BA                      | II                         | 4B1                      | Excalibur_c39876_403        | Kukri_c19909_733        | 70                         | 5.0876           | -0.2838                      | 12.3347            | 69.5-70.5           | -                                                         |
| BA                 | <i>AQ.BA.ndsu.4D.1</i>     | MELS; MERS              | I, III, V, VIII, X         | 4D1                      | wsnp_JD_rep_c51623_35119179 | Ra_c350_837             | 1                          | 14.2653          | -0.3725                      | 28.0617            | 0-1.5               | -                                                         |
| MELS               | <i>AQ.MELS.ndsu.4D.1</i>   | BA; MERS                | III, X                     | 4D1                      | wsnp_JD_rep_c51623_35119179 | Ra_c350_837             | 1                          | 6.6917           | -3.0005                      | 18.0403            | 0-1.5               | -                                                         |
| MERS               | <i>AQ.MERS.ndsu.4D.1</i>   | BA; MELS                | IV, X                      | 4D1                      | wsnp_JD_rep_c51623_35119179 | Ra_c350_837             | 1                          | 3.6362           | 0.4349                       | 13.0994            | 0-2.5               | -                                                         |
| BLV                | <i>AQ.BLV.ndsu.5A</i>      | -                       | IV, VI                     | 5A1                      | Kukri_c28555_114            | wsnp_Ku_c18023_27232712 | 36                         | 6.9598           | -5.0049                      | 15.8001            | 30.5-42.5           | -                                                         |
| BLV                | <i>AQ.BLV.ndsu.5B</i>      | GPC                     | X                          | 5B1                      | BS00064297_51               | wsnp_BE499835B-Ta_2_5   | 25                         | 5.5542           | 18.5451                      | 2.1438             | 11.5-35.5           | -                                                         |
| FE                 | <i>AQ.FE.ndsu.5B</i>       | -                       | V, X                       | 5B1                      | Kukri_c3070_72              | BS00021993_51           | 240                        | 3.4037           | 0.2971                       | 5.1324             | 238.5-241           | -                                                         |
| GPC                | <i>AQ.GPC.ndsu.5B</i>      | BLV                     | I, II, IV, V, VII, VIII, X | 5B1                      | BS00032003_51               | wsnp_BE499835B-Ta_2_5   | 14                         | 10.3662          | 0.3196                       | 20.1838            | 9.5-20.5            | -                                                         |
| MIXOPA             | <i>AQ.MIXOPA.ndsu.5B</i>   | -                       | II, III                    | 5B1                      | wsnp_Ex_c2582_4804223       | Tdurum_contig10268_1000 | 153                        | 3.5364           | 0.3448                       | 12.2996            | 152.5-153.5         | -                                                         |
| MMLPT              | <i>AQ.MMLPT.ndsu.5B</i>    | -                       | I, VII                     | 5B1                      | RAC875_c33933_350           | JD_c9261_426            | 49                         | 3.7684           | -0.2447                      | 7.2642             | 48.5-63.5           | -                                                         |
| BMT                | <i>AQ.BMT.ndsu.5D</i>      | MMLPT                   | IV, V, X                   | 5D1                      | BS00110953_51               | Excalibur_c16573_197    | 18                         | 4.5987           | -0.0698                      | 3.4365             | 9.5-19.5            | -                                                         |
| MMLPT              | <i>AQ.MMLPT.ndsu.5D</i>    | BMT                     | IV, VI, VIII, VIII, X      | 5D1                      | BS00110953_51               | Excalibur_c16573_197    | 19                         | 7.4008           | -0.1963                      | 15.3925            | 12.5-19.5           | -                                                         |
| BLV                | <i>AQ.BLV.ndsu.6B</i>      | CTCL                    | II, III                    | 6B1                      | BobWhite_c10140_297         | BobWhite_c8571_699      | 52                         | 6.1493           | 5.56                         | 15.4305            | 51.5-52.5           | -                                                         |
| CBCL               | <i>AQ.CBCL.ndsu.6B</i>     | -                       | II, X                      | 6B1                      | CAP8_c1678_709              | Kukri_c23433_416        | 46                         | 4.4927           | 0.0378                       | 3.1303             | 44.5-46.5           | Groos et al. 2007                                         |
| CTCL               | <i>AQ.CTCL.ndsu.6B.1</i>   | BLV                     | III                        | 6B1                      | BobWhite_c10140_297         | BobWhite_c8571_699      | 52                         | 5.5319           | 0.2905                       | 16.3676            | 51.5-52.5           | -                                                         |
| FE                 | <i>AQ.FE.ndsu.6B</i>       | -                       | II, IV, X                  | 6B1                      | BobWhite_c30500_527         | Excalibur_c31379_71     | 95                         | 5.4465           | -0.3753                      | 8.367              | 94.5-95.5           | -                                                         |
| BA                 | <i>AQ.BA.ndsu.6D</i>       | -                       | II, VIII                   | 6D1                      | wsnp_Ex_c23383_32628864     | BobWhite_c13435_700     | 43                         | 4.6326           | -1.3204                      | 3.7619             | 41.5-44.5           | -                                                         |
| BLV                | <i>AQ.BLV.ndsu.7A.1</i>    | -                       | IV, X                      | 7A1                      | Excalibur_rep_c109881_701   | Tdurum_contig16202_319  | 59                         | 4.5713           | 1.439                        | 8.3454             | 58.5-59.5           | -                                                         |

<sup>a</sup> GPC: grain protein content, BMT: bake mixing time, BA: baking absorption, BLV: bread loaf volume, CBCL: crumb color, CTCL: crust color, FE: flour extraction rate, MIXOPA: the general mixograph pattern, MELS: mixograph envelope left slope, MERS: mixograph envelope right slope, MMLPT: mixograph MID line peak time, MMLPV: mixograph MID line peak value, MMLTV: mixograph MID line time \* value, MMLPW: mixograph MID line peak width, MMLPI: mixograph MID line peak integral, DO: dough character; <sup>b</sup> I: Prosper 2012, II: Carrington 2012, III: Casselton 20012, IV: Prosper 2013, V: Carrington 2013, VI: Minot 2013, VII: Prosper 2014, VIII: Carrington 2014, VIII: Minot 2014, X: BLUP values across all locations; <sup>c</sup> centimorgan; <sup>d</sup> Log of the Odds; <sup>e</sup> Phenotypic variation.

**Table 5** QTL detected for end-use quality traits in a bread wheat (*Triticum aestivum* L.) RIL population derived from a cross between Glenn (PI-639273) and Traverse (PI-642780) (continued).

| Trait <sup>a</sup> | A-QTL name <sup>b</sup>   | Other associated traits | Env. <sup>c</sup> | Chromosome/linkage group | Left marker           | Right marker            | Position (cM) <sup>d</sup> | LOD <sup>e</sup> | Additive effect <sup>e</sup> | PV(%) <sup>g</sup> | Confidence intervals | Previously identified A-QTL in the same chromosome region |
|--------------------|---------------------------|-------------------------|-------------------|--------------------------|-----------------------|-------------------------|----------------------------|------------------|------------------------------|--------------------|----------------------|-----------------------------------------------------------|
| BLV                | <i>AQ.BLV.ndsu.7A.2</i>   | -                       | IV, X             | 7A1                      | RAC875_c9012_276      | BobWhite_c15497_199     | 118                        | 6.5815           | 1.7646                       | 12.6133            | 116.5-118.5          | -                                                         |
| BMT                | <i>AQ.BMT.ndsu.7A</i>     | -                       | IV, X             | 7A1                      | Excalibur_c44794_122  | RAC875_c55351_223       | 5                          | 5.5287           | 0.0764                       | 4.1206             | 1.5-6.5              | -                                                         |
| CTCL               | <i>AQ.CTCL.ndsu.7A</i>    | MMLPV                   | III, X            | 7A1                      | Excalibur_c33589_373  | RAC875_rep_c111778_387  | 86                         | 5.6857           | 0.016                        | 15.7116            | 85.5-86.5            | -                                                         |
| GPC                | <i>AQ.GPC.ndsu.7A.1</i>   | MMLPT                   | II                | 7A1                      | BobWhite_c23261_226   | BS00022970_51           | 24                         | 4.2443           | 0.1848                       | 6.5514             | 22.5-24.5            | -                                                         |
| MMLPT              | <i>AQ.MMLPT.ndsu.7A.1</i> | GPC                     | VIII              | 7A1                      | BobWhite_c23261_226   | BS00022970_51           | 24                         | 3.6069           | -0.2228                      | 5.9423             | 23.5-24.5            | -                                                         |
| MMLPV              | <i>AQ.MMLPV.ndsu.7A.1</i> | CTCL                    | IV                | 7A1                      | Excalibur_c33589_373  | RAC875_rep_c111778_387  | 86                         | 4.1338           | 1.8898                       | 11.2755            | 84.5-86.5            | -                                                         |
| GPC                | <i>AQ.GPC.ndsu.7A</i>     | -                       | IV, VII, VIII, X  | 7A2                      | BobWhite_c55693_396   | BS00023003_51           | 16                         | 4.6188           | 0.1507                       | 7.1353             | 15.5-17              | Christov et al 2007                                       |
| BLV                | <i>AQ.BLV.ndsu.7B</i>     | -                       | V, X              | 7B1                      | BobWhite_c41356_62    | wsnp_CAP7_c44_26549     | 33                         | 3.7635           | 3.4251                       | 10.7091            | 31.5-39.5            | -                                                         |
| MMLPT              | <i>AQ.MMLPT.ndsu.7B</i>   | -                       | I, III            | 7B1                      | BobWhite_c44404_312   | CAP12_c1816_325         | 42                         | 4.3413           | -0.3644                      | 3.6894             | 41.5-50.5            | -                                                         |
| BMT                | <i>AQ.BMT.ndsu.7D</i>     | -                       | I, V              | 7D1                      | Kukri_c23468_590      | Kukri_c16416_647        | 12                         | 3.4443           | 0.1253                       | 4.8285             | 7.5-13.5             | -                                                         |
| FE                 | <i>AQ.FE.ndsu.7D</i>      | -                       | IV, VI            | 7D2                      | RAC875_c39217_314     | Excalibur_c16580_388    | 1                          | 3.518            | 0.7611                       | 11.1963            | 0-3.5                | -                                                         |
| DO                 | <i>AQ.DO.ndsu.7D</i>      | -                       | VI, X             | 7D3                      | wsnp_BE490643D-Ta_2_1 | BobWhite_rep_c65034_450 | 71                         | 4.1343           | -0.0572                      | 13.6687            | 70.5-72.5            | -                                                         |
| MMLPT              | <i>AQ.MMLPT.ndsu.7D</i>   | -                       | I, III            | 7D3                      | IAAV6265              | BobWhite_c7263_337      | 27                         | 3.544            | 0.315                        | 3.0233             | 25.5-32.5            | -                                                         |

<sup>a</sup> GPC: grain protein content, BMT: bake mixing time, BA: baking absorption, BLV: bread loaf volume, CBCL: crumb color, CTCL: crust color, FE: flour extraction rate, MIXOPA: the general mixograph pattern, MELS: mixograph envelope left slope, MERS: mixograph envelope right slope, MMLPT: mixograph MID line peak time, MMLPV: mixograph MID line peak value, MMLTV: mixograph MID line time \* value, MMLPW: mixograph MID line peak width, MMLPI: mixograph MID line peak integral, DO: dough character; <sup>b</sup> I: Prosper 2012, II: Carrington 2012, III: Casselton 20012, IV: Prosper 2013, V: Carrington 2013, VI: Minot 2013, VII: Prosper 2014, VIII: Carrington 2014, VIII: Minot 2014, X: BLUP values across all locations; <sup>c</sup> centimorgan; <sup>d</sup> Log of the Odds; <sup>e</sup> Phenotypic variation.

**Table 6** Digenic epistatic QTL (DE-QTL) detected for end-use quality traits in a bread wheat (*Triticum aestivum* L.) RIL population derived from a cross between Glenn (PI-639273) and Traverse (PI-642780).

| Trait <sup>a</sup> | DE-QTL Name <sup>b</sup> | Env.       | Other associated traits | Chrom.1 name | Position 1 | Left Marker1                 | Right Marker1                 | Chrom.2 name | Position 2 | Left Marker2                 | Right Marker2            | Associated A-QTL | LOD  | PV(%) | Additive by Additive Effects |
|--------------------|--------------------------|------------|-------------------------|--------------|------------|------------------------------|-------------------------------|--------------|------------|------------------------------|--------------------------|------------------|------|-------|------------------------------|
| BA                 | DEQ.BA.ndsu.1A1/1A1      | II, VI, X  | -                       | 1A1          | 5          | Kukri_c13513_759             | RAC875_c50463_808             | 1A1          | 30         | RFL_Contig1703_695           | Excalibur_rep_c92985_618 | -                | 3.86 | 6.94  | 1.28                         |
| BMT                | DEQ.BMT.ndsu.1A1/1A1     | VI, X      | -                       | 1A1          | 0          | Kukri_c13513_759             | RAC875_c50463_808             | 1A1          | 120        | BobWhite_c27541_67           | IAAV2729                 | -                | 3.64 | 2.10  | 0.06                         |
| BMT                | DEQ.BMT.ndsu.1A1/4D1     | V, X       | -                       | 1A1          | 120        | BobWhite_c27541_67           | IAAV2729                      | 4D1          | 0          | w SNP_JD_rep_c51623_35119179 | Ra_c350_837              | AQ.BA.ndsu.4D.1  | 3.58 | 1.90  | -0.12                        |
| MMLPT              | DEQ.MMLPT.ndsu.1A1/4D1   | I, VIII, X | -                       | 1A1          | 5          | Kukri_c13513_759             | RAC875_c50463_808             | 4D1          | 0          | w SNP_JD_rep_c51623_35119179 | Ra_c350_837              | AQ.BA.ndsu.4D.1  | 4.54 | 2.32  | -0.22                        |
| MMLPW              | DEQ.MMLPW.ndsu.1A1/5A1   | II, X      | -                       | 1A1          | 35         | RFL_Contig1703_695           | Excalibur_rep_c92985_618      | 5A1          | 60         | IAAV3916                     | RAC875_c54693_298        | -                | 5.08 | 2.56  | -1.20                        |
| MIXOPA             | DEQ.MIXOPA.ndsu.1A1/7A1  | VIII, X    | MMLTV                   | 1A1          | 125        | BobWhite_c27541_67           | IAAV2729                      | 7A1          | 170        | w SNP_Ex_c6354_11053460      | BS00053365_51            | -                | 4.87 | 1.27  | 0.15                         |
| MMLTV              | DEQ.MMLTV.ndsu.1A1/7A1   | VIII, VIII | MIXOPA                  | 1A1          | 130        | BobWhite_c27541_67           | IAAV2729                      | 7A1          | 180        | Excalibur_c48973_1688        | IACX6080                 | -                | 3.60 | 2.23  | 2.13                         |
| MMLPW              | DEQ.MMLPW.ndsu.1A1/7B1   | I, X       | -                       | 1A1          | 0          | Kukri_c13513_759             | RAC875_c50463_808             | 7B1          | 0          | Tdurum_contig57324_104       | Excalibur_c21252_227     | -                | 3.51 | 1.35  | 0.81                         |
| GPC                | DEQ.GPC.ndsu.1A1/7D3     | II, V      | MERS                    | 1A1          | 15         | Excalibur_c5139_198          | w SNP_Ex_c1358_2601510        | 7D3          | 20         | Kukri_c37793_135             | Kukri_c9804_462          | -                | 4.73 | 1.30  | -0.30                        |
| GPC                | DEQ.GPC.ndsu.1A1/7D3     | I, X       | -                       | 1A1          | 30         | RFL_Contig1703_695           | Excalibur_rep_c92985_618      | 7D3          | 25         | IAAV6265                     | BobWhite_c7263_337       | -                | 3.51 | 1.90  | -0.13                        |
| MERS               | DEQ.MERS.ndsu.1A1/7D3    | V, X       | GPC                     | 1A1          | 15         | Excalibur_c5139_198          | w SNP_Ex_c1358_2601510        | 7D3          | 20         | Kukri_c37793_135             | Kukri_c9804_462          | -                | 5.74 | 3.16  | 1.30                         |
| MMLPV              | DEQ.MMLPV.ndsu.1B1/7B1   | VII, VIII  | MMLTV                   | 1B1          | 0          | RAC875_c4385_1628            | w SNP_Ra_c23758_33291657      | 7B1          | 50         | CAP12_c1816_325              | BobWhite_c14812_828      | -                | 3.88 | 8.15  | 2.56                         |
| MMLTV              | DEQ.MMLTV.ndsu.1B1/7B1   | VII, VIII  | MMLPV                   | 1B1          | 5          | RAC875_c4385_1628            | w SNP_Ra_c23758_33291657      | 7B1          | 45         | CAP12_c1816_325              | BobWhite_c14812_828      | -                | 4.80 | 3.46  | 3.20                         |
| MMLPT              | DEQ.MMLPT.ndsu.1D1/5D1   | V, X       | -                       | 1D1          | 20         | RAC875_c16352_594            | CAP8_c2401_433                | 5D1          | 0          | w SNP_Ku_c44483_51751682     | w SNP_JD_c825_1223454    | -                | 3.96 | 1.90  | 0.33                         |
| MMLPI              | DEQ.MMLPI.ndsu.2A1/2B1   | IV, VIII   | -                       | 2A1          | 5          | Excalibur_c51876_189         | w SNP_Ku_c10302_17079851      | 2B1          | 30         | TA002233-0872                | Ku_c36209_204            | -                | 4.06 | 0.92  | 7.74                         |
| MMLPT              | DEQ.MMLPT.ndsu.2A1/2B2   | I, II, X   | -                       | 2A1          | 10         | w SNP_JD_rep_c48914_33168544 | w SNP_Ex_rep_c102538_87682273 | 2B2          | 20         | GENE-0592_352                | BS00064658_51            | -                | 5.59 | 1.87  | -0.61                        |

<sup>a</sup> GPC: grain protein content, BMT: bake mixing time, BA: baking absorption, BLV: bread loaf volume, CBCL: crumb color, CTCL: crust color, FE: flour extraction rate, MIXOPA: the general mixograph pattern, MELSL: mixograph envelope left slope, MERS: mixograph envelope right slope, MMLPT: mixograph MID line peak time, MMLPV: mixograph MID line peak value, MMLTV: mixograph MID line time \* value, MMLPW: mixograph MID line peak width, MMLPI: mixograph MID line peak integral, DO: dough character; <sup>b</sup> I: Prosper 2012, II: Carrington 2012, III: Casselton 20012, IV: Prosper 2013, V: Carrington 2013, VI: Minot 2013, VII: Prosper 2014, VIII: Carrington 2014, VIII: Minot 2014, X: BLUP values across all locations; <sup>c</sup> centimorgan; <sup>d</sup> Log of the Odds; <sup>e</sup> Phenotypic variation.

**Table 6** Digenic epistatic QTL (DE-QTL) detected for end-use quality traits in a bread wheat (*Triticum aestivum* L.) RIL population derived from a cross between Glenn (PI-639273) and Traverse (PI-642780) (continued).

| Trait <sup>a</sup> | DE-QTL Name <sup>b</sup> | Env.               | Other associated traits | Chrom.1 name | Position 1 | Left Marker1             | Right Marker1                | Chrom.2 name | Position 2 | Left Marker2              | Right Marker2            | Associated A-QTL | LO D | PV(%) | Additive by Additive Effects |
|--------------------|--------------------------|--------------------|-------------------------|--------------|------------|--------------------------|------------------------------|--------------|------------|---------------------------|--------------------------|------------------|------|-------|------------------------------|
| FE                 | DEQ.FE.ndsu.2A1/3A2      | II, X              | -                       | 2A1          | 105        | BobWhite_rep_c50285_616  | Tdurum_contig67827_98        | 3A2          | 0          | Ex_c35861_1382            | Tdurum_contig42150_3190  | -                | 3.35 | 1.72  | -0.27                        |
| MIXOP A            | DEQ.MIXOPA.ndsu.2A1/3A2  | VIII, X            | -                       | 2A1          | 45         | Excalibur_c65910_246     | RAC875_c81899_216            | 3A2          | 45         | BobWhite_c38444_238       | RAC875_c15109_106        | AQ.BMT.ndsu.3A   | 3.75 | 1.20  | -0.41                        |
| MIXOP A            | DEQ.MIXOPA.ndsu.2A1/5B   | VIII, X            | -                       | 2A1          | 115        | IAAV880                  | CAP12_c575_105               | 5B           | 225        | GENE-2471_259             | Kukri_c9285_762          | -                | 4.20 | 2.59  | -0.31                        |
| MMLPT              | DEQ.MMLPT.ndsu.2A1/6D1   | I, X               | -                       | 2A1          | 0          | w SNP_Ex_c5412_9565527   | Ra_c10616_265                | 6D1          | 35         | w SNP_Ex_c23383_32628864  | BobWhite_c13435_700      | AQ.BA.ndsu.6D    | 4.13 | 1.91  | -0.63                        |
| MERS               | DEQ.MERS.ndsu.2A1/7A1    | IV, X              | -                       | 2A1          | 125        | CAP8_c3129_381           | Tdurum_contig92425_3144      | 7A1          | 185        | Excalibur_c1142_724       | Tdurum_contig54832_139   | -                | 4.04 | 2.71  | 0.42                         |
| MMLPT              | DEQ.MMLPT.ndsu.2A2/4B1   | II, III, VII, VIII | -                       | 2A2          | 0          | Excalibur_c29231_932     | RAC875_c8069_1709            | 4B1          | 55         | w SNP_Ex_c26285_35532440  | RAC875_rep_c119568_203   | -                | 5.00 | 2.19  | -0.21                        |
| MELS               | DEQ.MELS.ndsu.2B1/2B2    | I, II              | -                       | 2B1          | 10         | BobWhite_c19554_544      | Kukri_c9785_1557             | 2B2          | 95         | BobWhite_c23046_293       | w SNP_Ex_c3695_6740339   | -                | 5.49 | 1.87  | -6.74                        |
| BMT                | DEQ.BMT.ndsu.2B2/1D1     | VI, VIII           | -                       | 2B2          | 15         | BobWhite_rep_c64429_660  | Kukri_c53810_315             | 1D1          | 60         | CAP8_c1305_148            | BS00022168_51            | -                | 3.37 | 0.89  | -0.13                        |
| MMLPT              | DEQ.MMLPT.ndsu.2B2/1D1   | II, VI             | -                       | 2B2          | 100        | BobWhite_c23046_293      | w SNP_Ex_c3695_6740339       | 1D1          | 45         | CAP8_c1305_148            | BS00022168_51            | -                | 4.37 | 1.99  | -0.74                        |
| FE                 | DEQ.FE.ndsu.2B2/2D2      | I, X               | -                       | 2B2          | 170        | Excalibur_c15671_87      | Excalibur_c29221_311         | 2D2          | 5          | Kukri_c9478_2764          | Kukri_c65380_490         | -                | 3.11 | 1.75  | 0.27                         |
| BMT                | DEQ.BMT.ndsu.2B2/5B      | IV, VI             | -                       | 2B2          | 100        | BobWhite_c23046_293      | w SNP_Ex_c3695_6740339       | 5B           | 30         | BS00064297_51             | w SNP_BE499835B-Ta_2_5   | AQ.GPC.ndsu.5B   | 8.45 | 2.50  | -0.20                        |
| GPC                | DEQ.GPC.ndsu.2B2/5B      | II, X              | -                       | 2B2          | 0          | BS00070900_51            | GENE-1343_315                | 5B           | 125        | Kukri_c34173_169          | w SNP_Ku_c3201_5970486   | -                | 5.09 | 1.51  | -0.28                        |
| BMT                | DEQ.BMT.ndsu.2B2/6B1     | V, X               | -                       | 2B2          | 25         | GENE-0592_352            | BS00064658_51                | 6B1          | 135        | w SNP_Ex_c9038_15058444   | Tdurum_contig43335_1397  | -                | 4.27 | 3.25  | -0.16                        |
| FE                 | DEQ.FE.ndsu.2B2/7D1      | II, X              | -                       | 2B2          | 65         | Excalibur_c45094_602     | BS00040959_51                | 7D1          | 15         | w SNP_Ex_c17914_26681837  | RAC875_c11933_885        | -                | 4.13 | 2.45  | -0.31                        |
| MMLPT              | DEQ.MMLPT.ndsu.2B2/7D3   | V, X               | -                       | 2B2          | 50         | RFL_Contig996_818        | Tdurum_contig30989_79        | 7D3          | 15         | Kukri_c37793_135          | Kukri_c9804_462          | -                | 3.44 | 1.82  | 0.17                         |
| MMLPT              | DEQ.MMLPT.ndsu.3A1/2D1   | IV, VIII, X        | -                       | 3A1          | 0          | Tdurum_contig74920_757   | CAP8_rep_c3652_80            | 2D1          | 10         | RAC875_c110838_423        | Kukri_c12032_508         | -                | 4.35 | 1.69  | -0.17                        |
| MMLPT              | DEQ.MMLPT.ndsu.3A1/6A1   | I, II              | -                       | 3A1          | 65         | BS00077819_51            | Kukri_c51666_401             | 6A1          | 55         | BobWhite_c1131_328        | Excalibur_c29639_65      | -                | 3.52 | 2.33  | 0.33                         |
| MMLPT              | DEQ.MMLPT.ndsu.3A1/7A1   | I, IV              | -                       | 3A1          | 50         | TA002540-0938            | RAC875_c52195_324            | 7A1          | 45         | BS00065020_51             | tp1b0024a09_2106         | -                | 4.03 | 1.31  | 0.51                         |
| GPC                | DEQ.GPC.ndsu.3B1/2D2     | VII, X             | -                       | 3B1          | 45         | w SNP_Ex_c26128_35374652 | Excalibur_c45968_83          | 2D2          | 10         | Excalibur_rep_c104620_183 | w SNP_BE426620D-Ta_2_2   | -                | 5.42 | 2.23  | 0.15                         |
| BMT                | DEQ.BMT.ndsu.3B2/4B1     | V, X               | -                       | 3B2          | 30         | CAP12_c1468_114          | JD_c37202_67                 | 4B1          | 45         | w SNP_CAP12_c1101_569783  | BS00042105_51            | -                | 5.54 | 2.13  | 0.07                         |
| FE                 | DEQ.FE.ndsu.3B3/4B1      | II, X              | -                       | 3B3          | 5          | BS00087695_51            | BS00003884_51                | 4B1          | 100        | w SNP_Ra_c10988_17932922  | RAC875_rep_c82932_428    | -                | 3.41 | 1.92  | 0.29                         |
| BMT                | DEQ.BMT.ndsu.3B4/5B      | II, VIII           | -                       | 3B4          | 5          | BS00022154_51            | w SNP_Ex_rep_c66766_65123941 | 5B           | 180        | Excalibur_c12395_467      | w SNP_Ex_c32488_41134388 | -                | 3.25 | 1.44  | 0.15                         |

<sup>a</sup> GPC: grain protein content, BMT: bake mixing time, BA: baking absorption, BLV: bread loaf volume, CBCL: crumb color, CTCL: crust color, FE: flour extraction rate, MIXOPA: the general mixograph pattern, MELS: mixograph envelope left slope, MERS: mixograph envelope right slope, MMLPT: mixograph MID line peak time, MMLPV: mixograph MID line peak value, MMLTV: mixograph MID line time \* value, MMLPW: mixograph MID line peak width, MMLPI: mixograph MID line peak integral, DO: dough character; <sup>b</sup> I: Prosper 2012, II: Carrington 2012, III: Casselton 20012, IV: Prosper 2013, V: Carrington 2013, VI: Minot 2013, VII: Prosper 2014, VIII: Carrington 2014, VIII: Minot 2014, X: BLUP values across all locations; <sup>c</sup> centimorgan; <sup>d</sup> Log of the Odds; <sup>e</sup> Phenotypic variation.

**Table 6** Digenic epistatic QTL (DE-QTL) detected for end-use quality traits in a bread wheat (*Triticum aestivum* L.) RIL population derived from a cross between Glenn (PI-639273) and Traverse (PI-642780) (continued).

| Trait <sup>a</sup> | DE-QTL Name <sup>b</sup> | Env.            | Other associated traits | Chrom.1 name | Position 1 | Left Marker1            | Right Marker1           | Chrom.2 name | Position 2 | Left Marker2           | Right Marker2               | Associated A-QTL | LO D | PV(%) | Additive by Additive Effects |
|--------------------|--------------------------|-----------------|-------------------------|--------------|------------|-------------------------|-------------------------|--------------|------------|------------------------|-----------------------------|------------------|------|-------|------------------------------|
| MIXOP A            | DEQ.MIXOPA.ndsu.4A1/1B1  | I, X            | -                       | 4A1          | 10         | BS00035307_51           | RAC875_c16277_737       | 1B1          | 60         | RAC875_c61512_173      | wspn_Ex_c9091_15135511      | -                | 3.56 | 1.21  | -0.15                        |
| MERS               | DEQ.MERS.ndsu.4A1/1D1    | IV, VI, X       | -                       | 4A1          | 95         | wspn_Ku_c4924_8816643   | Tdurum_contig42526_994  | 1D1          | 10         | Excalibur_c35316_137   | RAC875_c16352_594           | -                | 5.03 | 5.59  | 1.69                         |
| MMLPI              | DEQ.MMLPI.ndsu.4A1/2D2   | IV, VI          | -                       | 4A1          | 55         | RFL_Contig5998_745      | RAC875_c65221_438       | 2D2          | 5          | Kukri_c9478_2764       | Kukri_c65380_490            | -                | 4.78 | 1.44  | 11.39                        |
| MMLPT              | DEQ.MMLPT.ndsu.4A1/5A1   | I, III, IV, V   | -                       | 4A1          | 90         | Tdurum_contig47148_651  | RAC875_c25124_182       | 5A1          | 30         | Kukri_c28555_114       | wspn_Ku_c18023_27232712     | AQ.BLV.ndsu.5A   | 4.19 | 1.66  | 0.55                         |
| GPC                | DEQ.GPC.ndsu.4A1/6D2     | III, VIII       | -                       | 4A1          | 85         | Ex_c66324_1151          | wspn_Ex_c5470_9657856   | 6D2          | 0          | BS00022523_51          | Kukri_rep_c105352_281       | -                | 3.29 | 1.04  | -0.19                        |
| BMT                | DEQ.BMT.ndsu.4A1/7B1     | I, VI           | -                       | 4A1          | 35         | wspn_Ex_c22913_32130617 | CAP12_c2677_138         | 7B1          | 40         | BobWhite_c41356_62     | wspn_CAP7_c44_26549         | -                | 4.63 | 1.03  | -0.20                        |
| GPC                | DEQ.GPC.ndsu.4A1/7B1     | VII, VIII       | -                       | 4A1          | 5          | BS00035307_51           | RAC875_c16277_737       | 7B1          | 80         | BobWhite_c6580_361     | wspn_Ex_c10550_17231294     | -                | 3.60 | 3.49  | 0.30                         |
| MMLPW              | DEQ.MMLPW.ndsu.4A1/7B1   | VIII, X         | -                       | 4A1          | 80         | Kukri_c27874_515        | Ex_c66324_1151          | 7B1          | 5          | Excalibur_c21252_227   | Excalibur_c8486_471         | -                | 3.97 | 1.63  | 0.30                         |
| MMLPT              | DEQ.MMLPT.ndsu.4B1/2D1   | IV, VII         | -                       | 4B1          | 70         | Excalibur_c39876_403    | Kukri_c19909_733        | 2D1          | 10         | RAC875_c110838_423     | Kukri_c12032_508            | -                | 4.03 | 1.00  | 0.18                         |
| BMT                | DEQ.BMT.ndsu.4B1/5B      | V, VII, X       | -                       | 4B1          | 90         | wspn_Ex_c15490_23776560 | IAAV8499                | 5B           | 0          | BS00032003_51          | BS00064297_51               | AQ.GPC.ndsu.5B   | 5.65 | 2.58  | 0.20                         |
| MMLTV              | DEQ.MMLTV.ndsu.4B1/5D1   | VII, X          | -                       | 4B1          | 60         | RAC875_rep_c119568_203  | Tdurum_contig59914_323  | 5D1          | 20         | wspn_Ex_c5185_9189184  | D_GDS7LZN02F4FP5_176        | -                | 3.70 | 1.96  | 2.38                         |
| FE                 | DEQ.FE.ndsu.5A1/1D1      | II, IV, VI, VII | -                       | 5A1          | 35         | Kukri_c28555_114        | wspn_Ku_c18023_27232712 | 1D1          | 25         | RAC875_c16352_594      | CAP8_c2401_433              | AQ.BLV.ndsu.5A   | 4.65 | 3.84  | 1.07                         |
| MMLPI              | DEQ.MMLPI.ndsu.5A1/5A2   | IV, VI          | -                       | 5A1          | 35         | Kukri_c28555_114        | wspn_Ku_c18023_27232712 | 5A2          | 10         | BS00022683_51          | BobWhite_c17440_130         | AQ.BLV.ndsu.5A   | 4.61 | 1.85  | -13.09                       |
| MMLPI              | DEQ.MMLPI.ndsu.5A1/7B1   | IV, VI, X       | -                       | 5A1          | 20         | wspn_Ex_c31672_40435001 | Kukri_c28555_114        | 7B1          | 65         | Kukri_c18749_968       | Tdurum_contig12064_92       | -                | 3.58 | 1.42  | 11.23                        |
| MMLPI              | DEQ.MMLPI.ndsu.5A1/7D3   | IV, VIII        | MMLPT, MMLTV            | 5A1          | 75         | BS00020605_51           | BobWhite_c11539_336     | 7D3          | 50         | Tdurum_contig46368_632 | RAC875_c68368_99            | -                | 4.72 | 1.52  | -9.66                        |
| MMLPT              | DEQ.MMLPT.ndsu.5A1/7D3   | I, IV           | MMLTV, MMLPI            | 5A1          | 70         | BS00020605_51           | BobWhite_c11539_336     | 7D3          | 45         | Tdurum_contig46368_632 | RAC875_c68368_99            | -                | 4.69 | 1.63  | -0.23                        |
| MMLTV              | DEQ.MMLTV.ndsu.5A1/7D3   | IV, X           | MMLPT, MMLPI            | 5A1          | 70         | BS00020605_51           | BobWhite_c11539_336     | 7D3          | 55         | Tdurum_contig46368_632 | RAC875_c68368_99            | -                | 3.17 | 2.98  | -0.64                        |
| MMLPI              | DEQ.MMLPI.ndsu.5A2/7A1   | VI, X           | -                       | 5A2          | 25         | Kukri_c41797_393        | Ex_c19057_965           | 7A1          | 80         | wspn_Ex_c5939_10417052 | wspn_Ex_c39221_46569987     | -                | 3.88 | 4.13  | -4.30                        |
| GPC                | DEQ.GPC.ndsu.5A3/2B2     | I, X            | -                       | 5A3          | 5          | BS00099534_51           | Excalibur_c6714_246     | 2B2          | 5          | IAAV5802               | GENE-1676_1048              | -                | 3.91 | 1.89  | -0.16                        |
| MMLPT              | DEQ.MMLPT.ndsu.5A3/3B4   | III, VII, X     | -                       | 5A3          | 5          | BS00099534_51           | Excalibur_c6714_246     | 3B4          | 5          | BS00022154_51          | wspn_Ex_rep_c66766_65123941 | -                | 3.62 | 1.64  | -0.15                        |
| BMT                | DEQ.BMT.ndsu.5B/2D1      | V, VII, X       | -                       | 5B           | 105        | CAP12_c1419_574         | RAC875_c14780_54        | 2D1          | 0          | RAC875_c110838_423     | Kukri_c12032_508            | -                | 3.79 | 2.90  | -0.07                        |

<sup>a</sup> GPC: grain protein content, BMT: bake mixing time, BA: baking absorption, BLV: bread loaf volume, CBCL: crumb color, CTCL: crust color, FE: flour extraction rate, MIXOPA: the general mixograph pattern, MELS: mixograph envelope left slope, MERS: mixograph envelope right slope, MMLPT: mixograph MID line peak time, MMLPV: mixograph MID line peak value, MMLTV: mixograph MID line time \* value, MMLPW: mixograph MID line peak width, MMLPI: mixograph MID line peak integral, DO: dough character; <sup>b</sup> I: Prosper 2012, II: Carrington 2012, III: Casselton 20012, IV: Prosper 2013, V: Carrington 2013, VI: Minot 2013, VII: Prosper 2014, VIII: Carrington 2014, VIII: Minot 2014, X: BLUP values across all locations; <sup>c</sup> centimorgan; <sup>d</sup> Log of the Odds; <sup>e</sup> Phenotypic variation.

**Table 6** Digenic epistatic QTL (DE-QTL) detected for end-use quality traits in a bread wheat (*Triticum aestivum* L.) RIL population derived from a cross between Glenn (PI-639273) and Traverse (PI-642780) (continued).

| Trait <sup>a</sup> | DE-QTL Name <sup>b</sup> | Env.     | Other associated traits | Chrom.1 name | Position 1 | Left Marker1            | Right Marker1             | Chrom.2 name | Position 2 | Left Marker2                | Right Marker2               | Associated A-QTL               | LO D | PV(%) | Additive by Additive Effects |
|--------------------|--------------------------|----------|-------------------------|--------------|------------|-------------------------|---------------------------|--------------|------------|-----------------------------|-----------------------------|--------------------------------|------|-------|------------------------------|
| GPC                | DEQ.GPC.ndsu.5B/6D1      | VI, VIII | -                       | 5B           | 30         | BS00064297_51           | wsnp_BE499835B_Ta_2_5     | 6D1          | 45         | wsnp_Ex_c23383_32628864     | BobWhite_c13435_700         | AQ.GPC.ndsu.5B x AQ.BA.ndsu.6D | 5.73 | 0.79  | 0.98                         |
| MELS               | DEQ.MELS.ndsu.5B1/6B1    | I, X     | -                       | 5B1          | 170        | BobWhite_rep_c50349_139 | Kukri_c10508_755          | 6B1          | 100        | BS00037933_51               | BS00063217_51               | -                              | 3.86 | 1.51  | -0.74                        |
| BMT                | DEQ.BMT.ndsu.5D1/6D1     | IV, X    | -                       | 5D1          | 15         | BS00110953_51           | Excalibur_c16573_197      | 6D1          | 35         | wsnp_Ex_c23383_32628864     | BobWhite_c13435_700         | AQ.BMT.ndsu.5D x AQ.BA.ndsu.6D | 3.98 | 1.64  | 0.17                         |
| MMLPT              | DEQ.MMLPT.ndsu.6A1/4B1   | IV, VI   | -                       | 6A1          | 5          | RAC875_c32053_291       | BobWhite_c44549_83        | 4B1          | 110        | wsnp_Ku_c7838_13435765      | Excalibur_c26571_370        | -                              | 4.43 | 0.77  | 0.40                         |
| MMLPT              | DEQ.MMLPT.ndsu.6A2/5B    | I, X     | -                       | 6A2          | 10         | BS00110512_51           | BS00065028_51             | 5B           | 40         | BS00064297_51               | wsnp_BE499835B_Ta_2_5       | AQ.GPC.ndsu.5B                 | 4.88 | 2.05  | -0.59                        |
| GPC                | DEQ.GPC.ndsu.6B1/2D2     | II, VIII | -                       | 6B1          | 100        | BS00037933_51           | BS00063217_51             | 2D2          | 0          | wsnp_RFL_Contig2659_2346243 | RAC875_c78404_242           | -                              | 4.89 | 2.22  | -0.18                        |
| BLV                | DEQ.BLV.ndsu.6D1/7D3     | II, X    | -                       | 6D1          | 5          | BobWhite_c14066_403     | Ra_c32572_334             | 7D3          | 20         | Kukri_c37793_135            | Kukri_c9804_462             | -                              | 4.09 | 3.37  | 1.43                         |
| MIXOPA             | DEQ.MIXOPA.ndsu.7A1/7B1  | VIII, X  | -                       | 7A1          | 50         | tp1b0024a09_2106        | Tdurum_contig98029_517    | 7B1          | 5          | Excalibur_c21252_227        | Excalibur_c8486_471         | -                              | 3.84 | 1.44  | 0.41                         |
| MMLPT              | DEQ.MMLPT.ndsu.7A1/7D1   | I, VII   | -                       | 7A1          | 65         | wsnp_Ex_c13337_21022241 | RAC875_c28842_99          | 7D1          | 20         | BS00066128_51               | BS00083421_51               | -                              | 4.04 | 2.20  | -0.32                        |
| BMT                | DEQ.BMT.ndsu.7A1/7D3     | V, X     | -                       | 7A1          | 25         | BS00106739_51           | Excalibur_rep_c68458_1536 | 7D3          | 70         | wsnp_BE490643D_Ta_2_1       | BobWhite_rep_c65034_450     | -                              | 5.08 | 2.28  | 0.07                         |
| MMLPT              | DEQ.MMLPT.ndsu.7A1/7D3   | I, X     | -                       | 7A1          | 55         | BS00011330_51           | Tdurum_contig67992_238    | 7D3          | 75         | BobWhite_rep_c65034_450     | wsnp_CAP8_rep_c9647_4198594 | -                              | 4.32 | 1.81  | -0.17                        |
| MIXOPA             | DEQ.MIXOPA.ndsu.7A2/7B1  | VIII, X  | -                       | 7A2          | 10         | Kukri_c40353_179        | Excalibur_c59653_238      | 7B1          | 5          | Excalibur_c21252_227        | Excalibur_c8486_471         | -                              | 6.97 | 1.22  | 0.17                         |
| BMT                | DEQ.BMT.ndsu.7B1/7D2     | IV, VII  | -                       | 7B1          | 110        | wsnp_Ra_c39394_47110214 | BobWhite_c26534_532       | 7D2          | 5          | Excalibur_c16580_388        | Kukri_c19321_416            | -                              | 3.62 | 1.65  | 0.14                         |
| MMLPI              | DEQ.MMLPI.ndsu.7D1/7D3   | IV, VIII | -                       | 7D1          | 0          | BS00051338_51           | IAAV5917                  | 7D3          | 40         | BobWhite_c7263_337          | Tdurum_contig46368_632      | -                              | 4.74 | 1.96  | -13.80                       |

<sup>a</sup> GPC: grain protein content, BMT: bake mixing time, BA: baking absorption, BLV: bread loaf volume, CBCL: crumb color, CTCL: crust color, FE: flour extraction rate, MIXOPA: the general mixograph pattern, MELS: mixograph envelope left slope, MERS: mixograph envelope right slope, MMLPT: mixograph MID line peak time, MMLPV: mixograph MID line peak value, MMLTV: mixograph MID line time \* value, MMLPW: mixograph MID line peak width, MMLPI: mixograph MID line peak integral, DO: dough character; <sup>b</sup> I: Prosper 2012, II: Carrington 2012, III: Casselton 20012, IV: Prosper 2013, V: Carrington 2013, VI: Minot 2013, VII: Prosper 2014, VIII: Carrington 2014, VIII: Minot 2014, X: BLUP values across all locations; <sup>c</sup> centimorgan; <sup>d</sup> Log of the Odds; <sup>e</sup> Phenotypic variation.

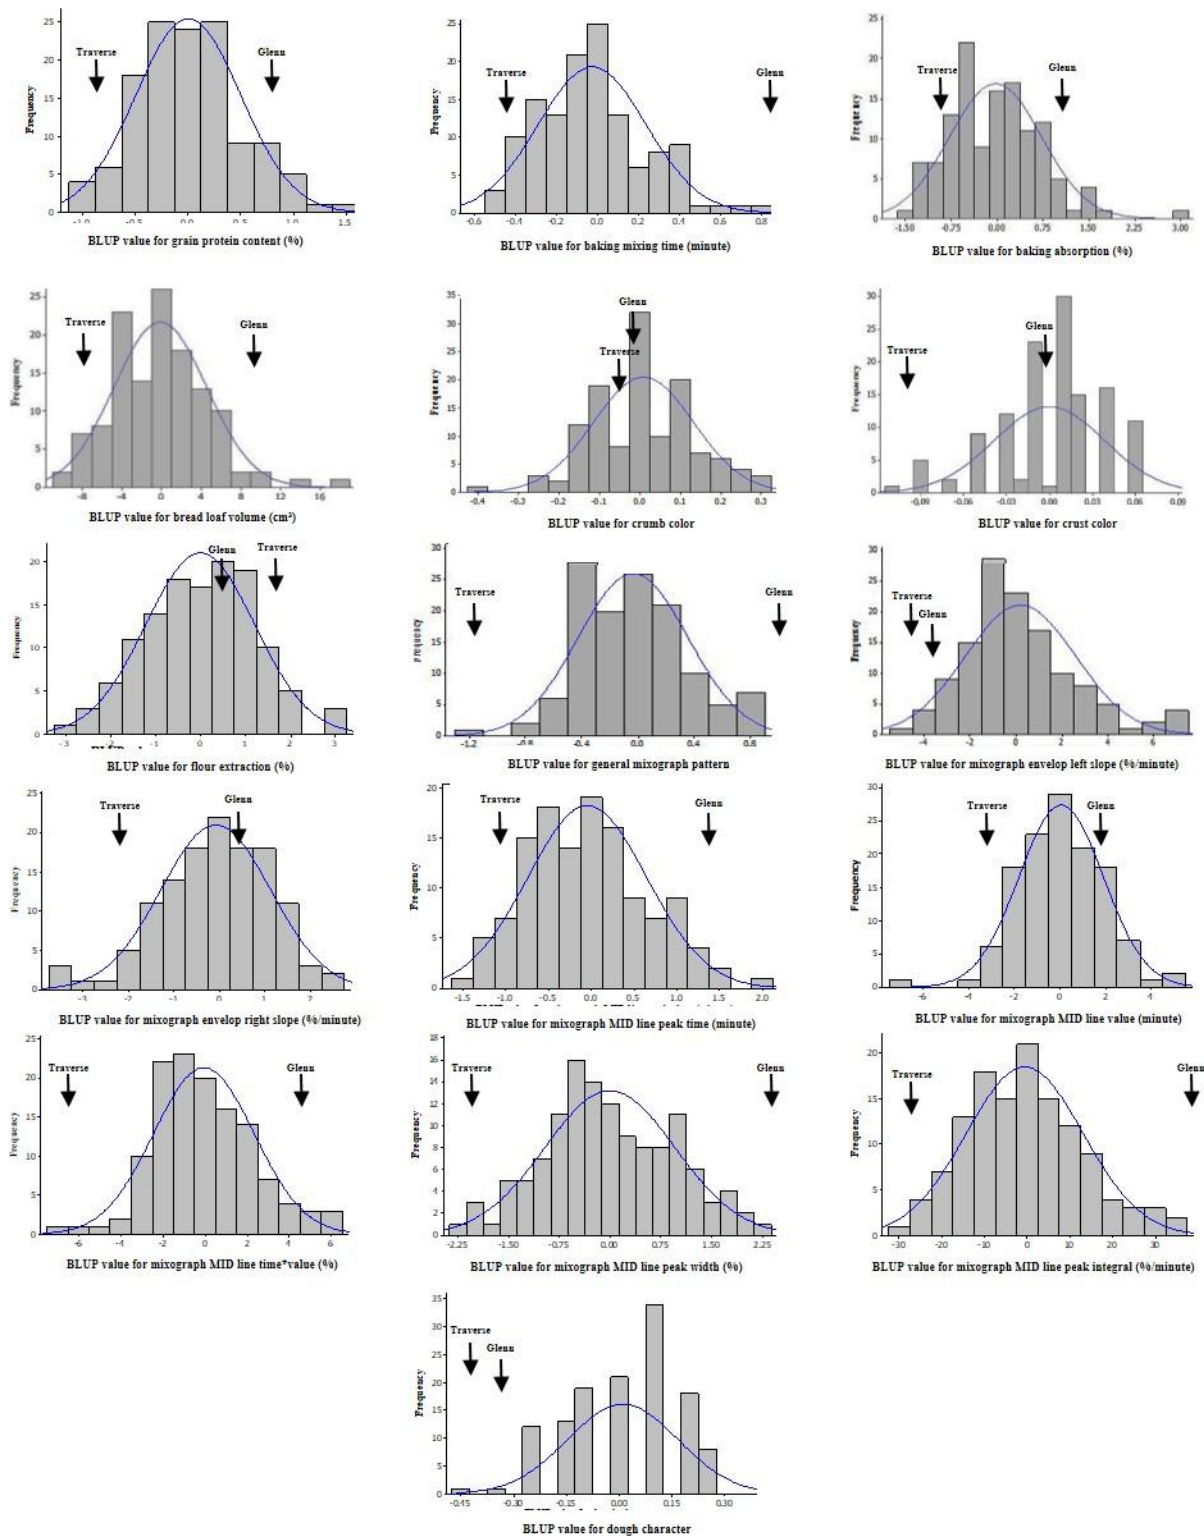

**Figure 1** Frequency distribution of BLUP values for end-use quality characteristics of a population of 127 recombinant inbred lines (RILs) derived from a cross between Glenn and Traverse across all environments. Estimates of the parental lines are indicated by arrows.



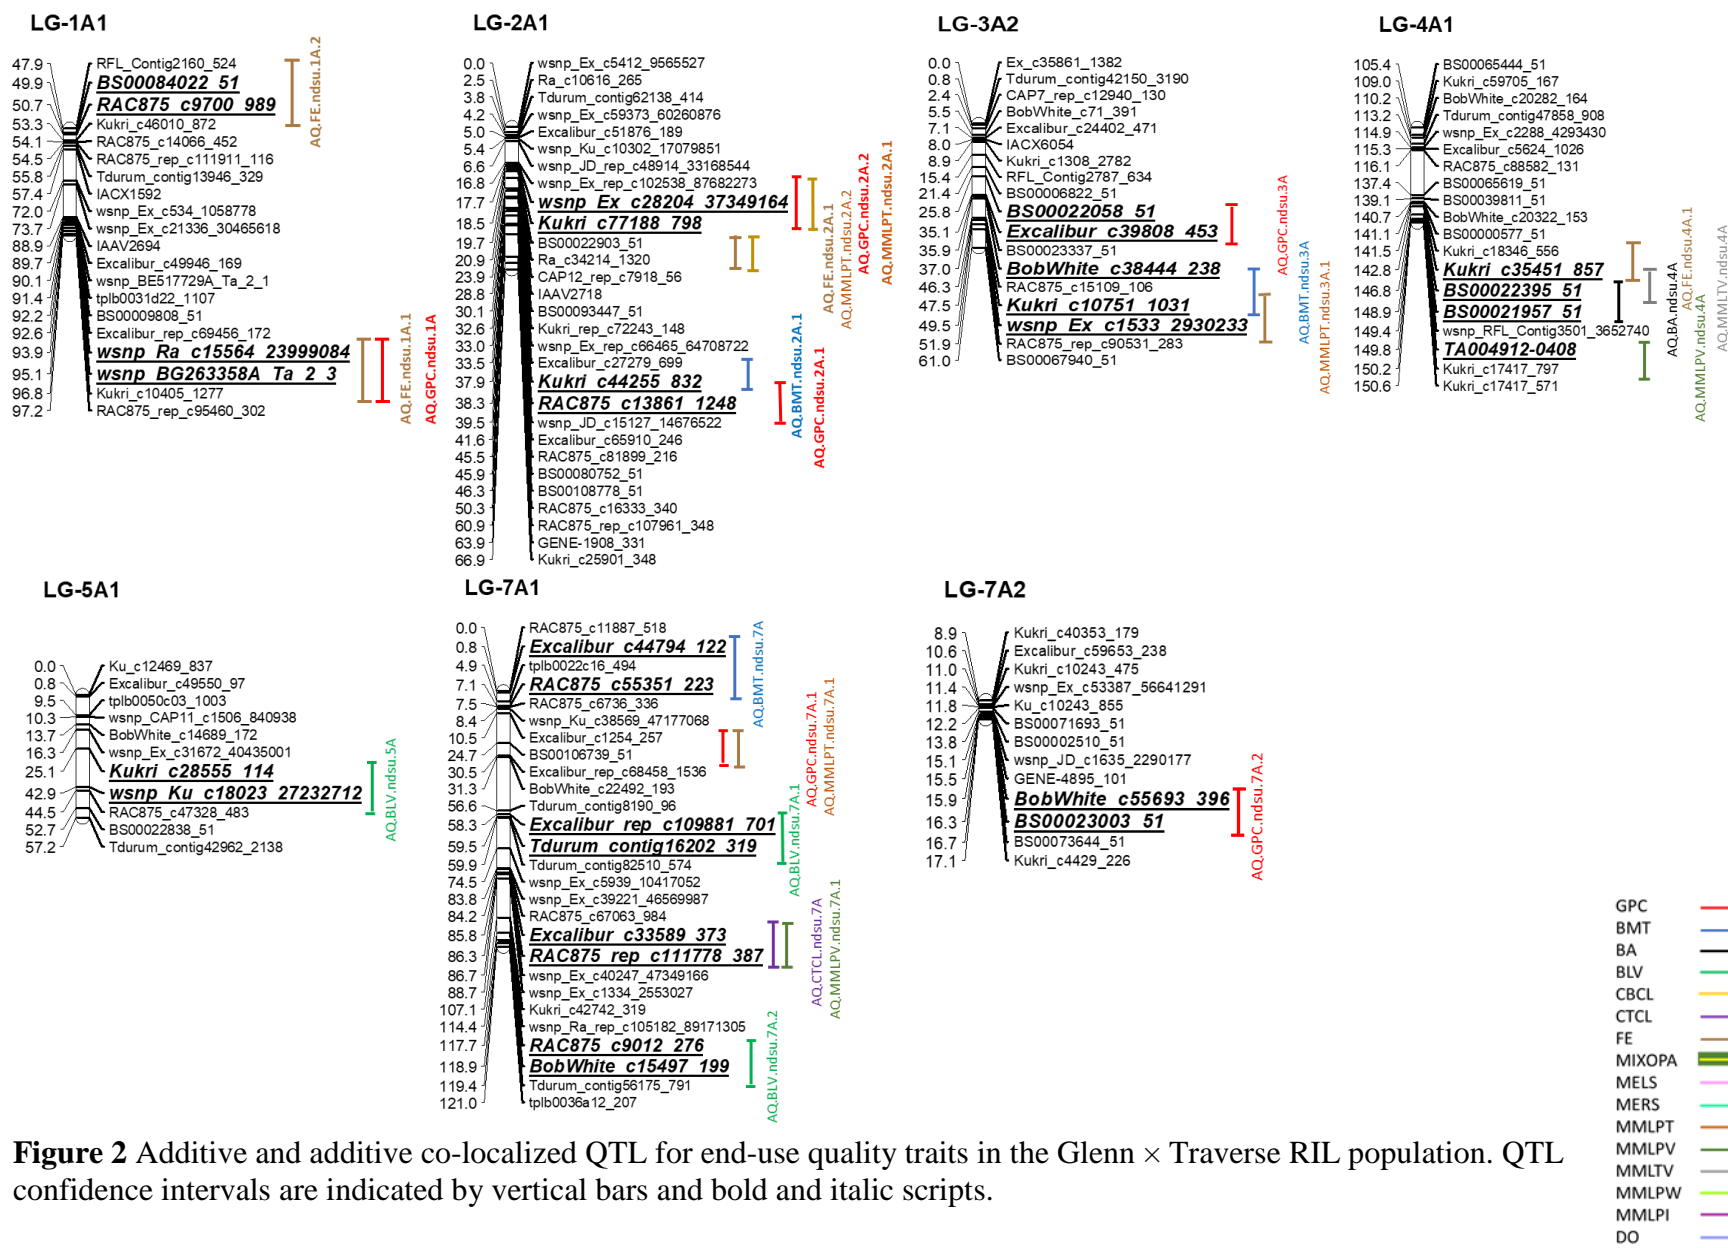

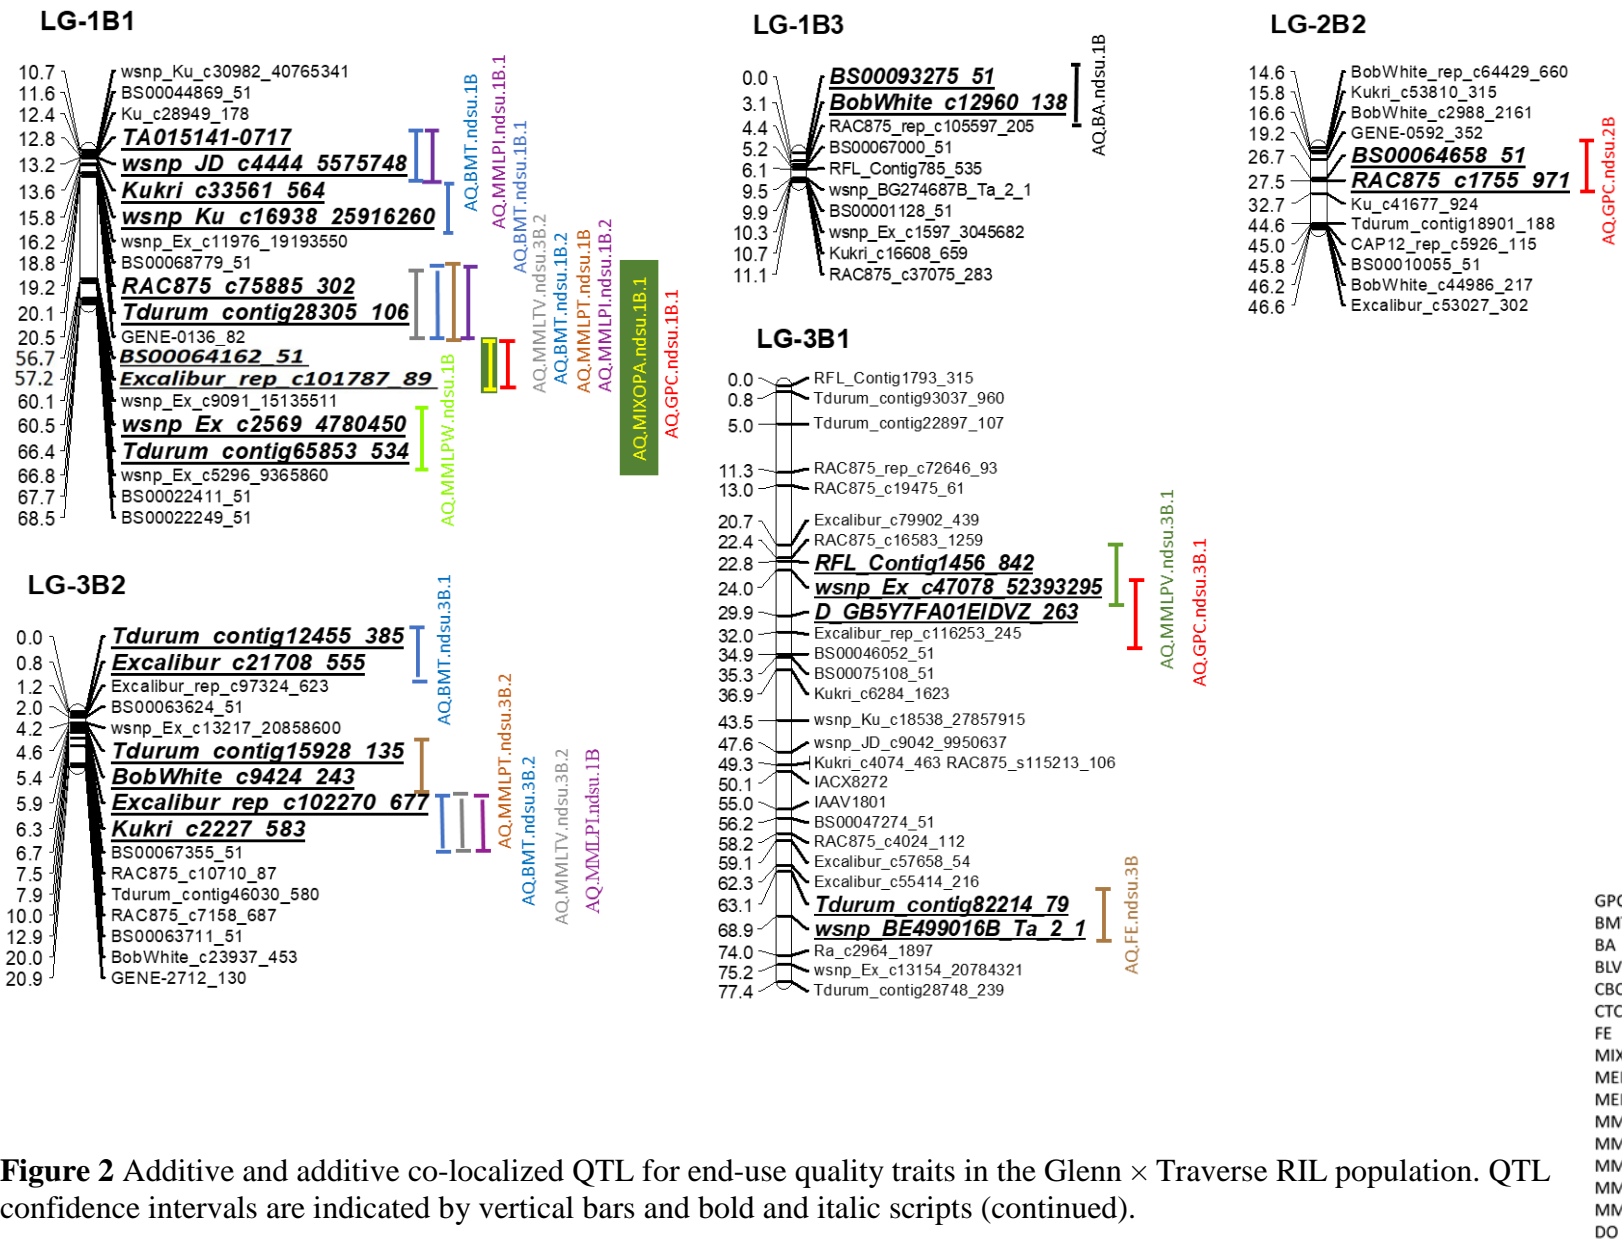

**Figure 2** Additive and additive co-localized QTL for end-use quality traits in the Glenn × Traverse RIL population. QTL confidence intervals are indicated by vertical bars and bold and italic scripts (continued).

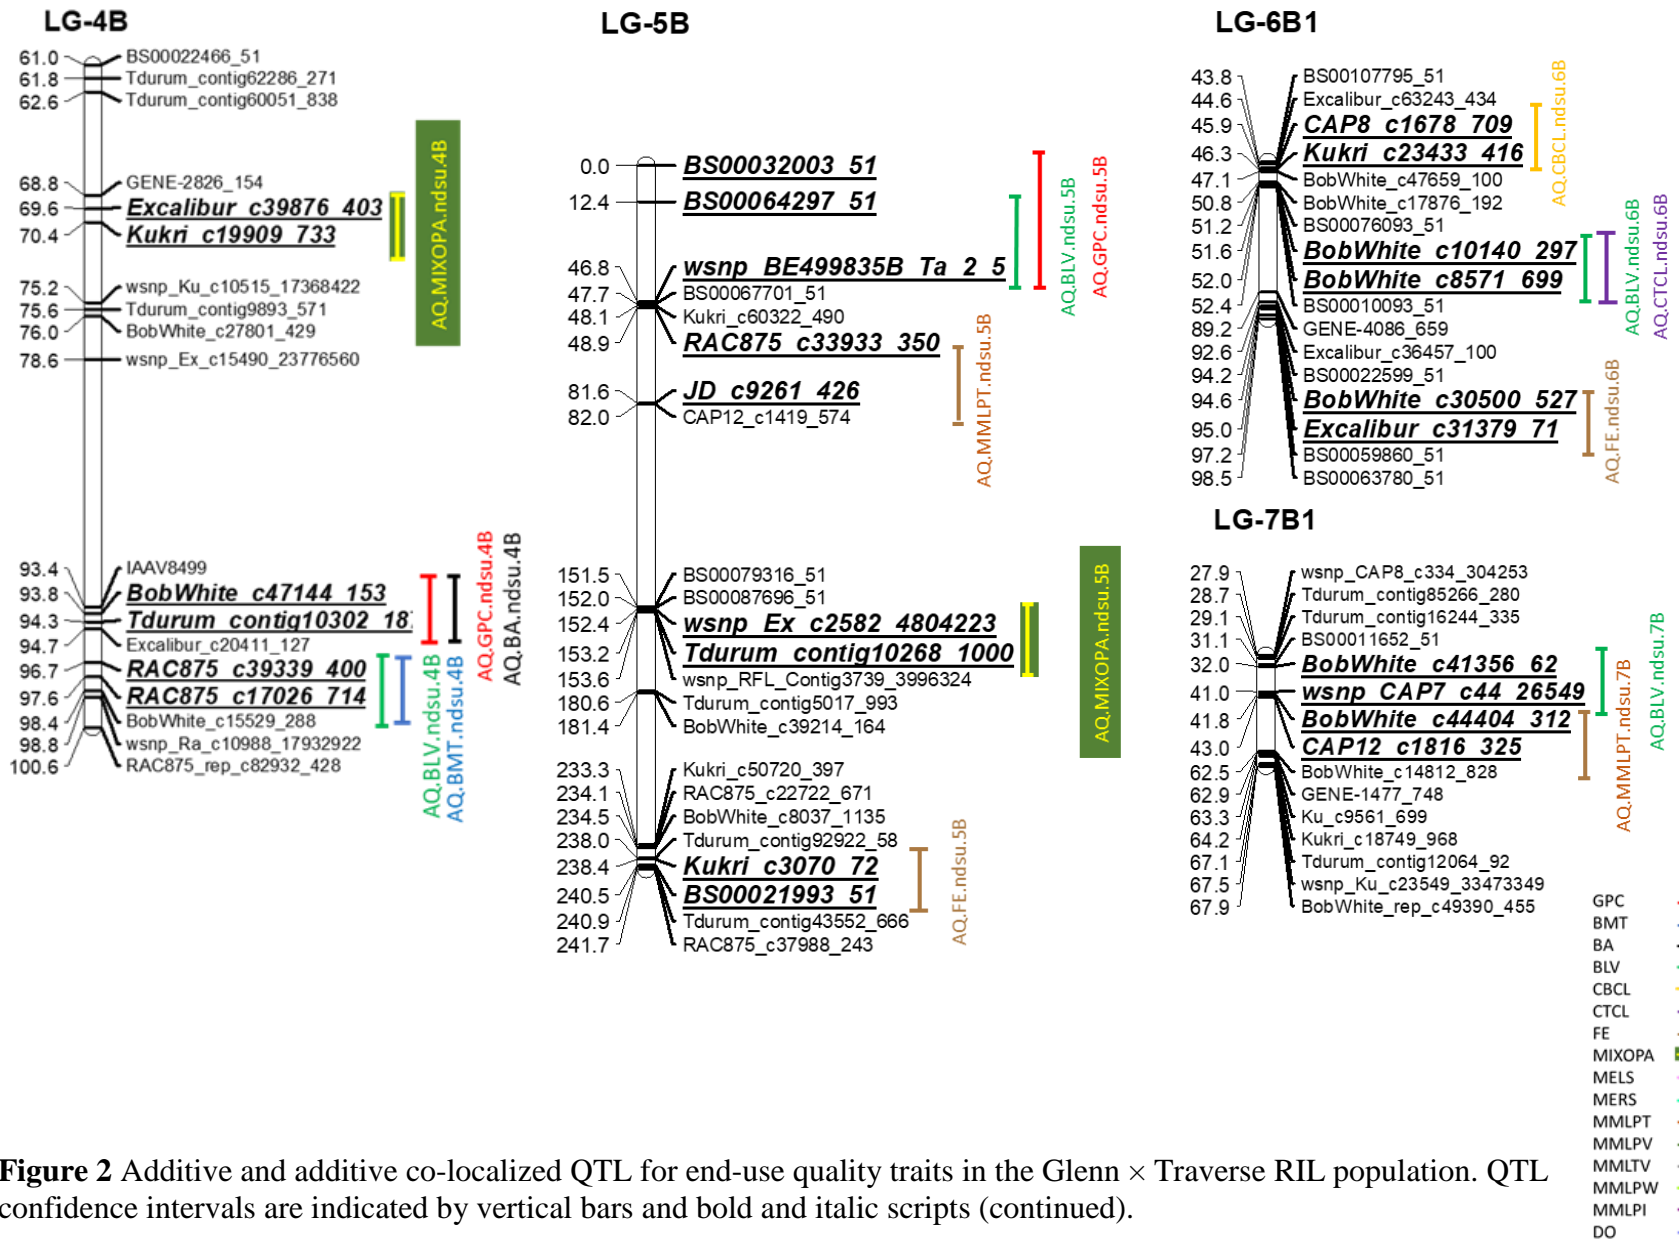

**Figure 2** Additive and additive co-localized QTL for end-use quality traits in the Glenn × Traverse RIL population. QTL confidence intervals are indicated by vertical bars and bold and italic scripts (continued).

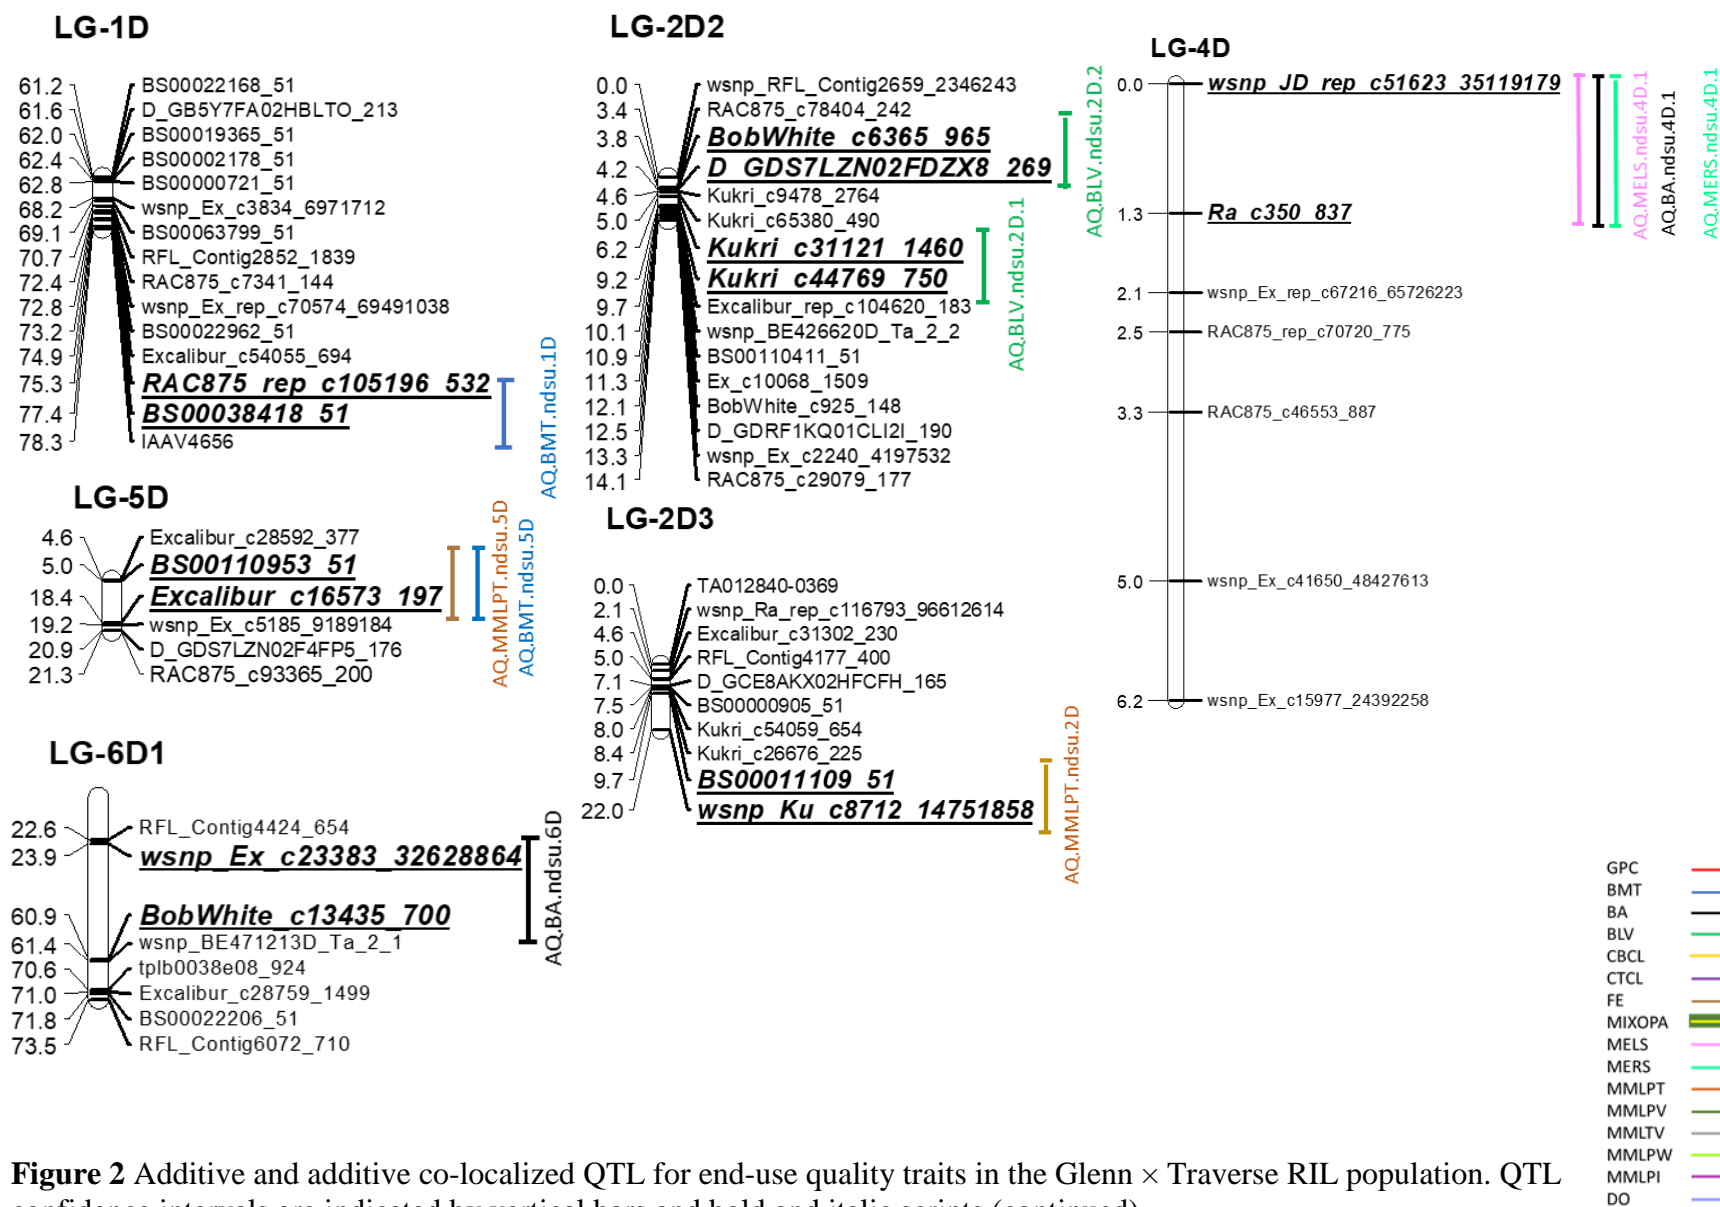

**Figure 2** Additive and additive co-localized QTL for end-use quality traits in the Glenn × Traverse RIL population. QTL confidence intervals are indicated by vertical bars and bold and italic scripts (continued).

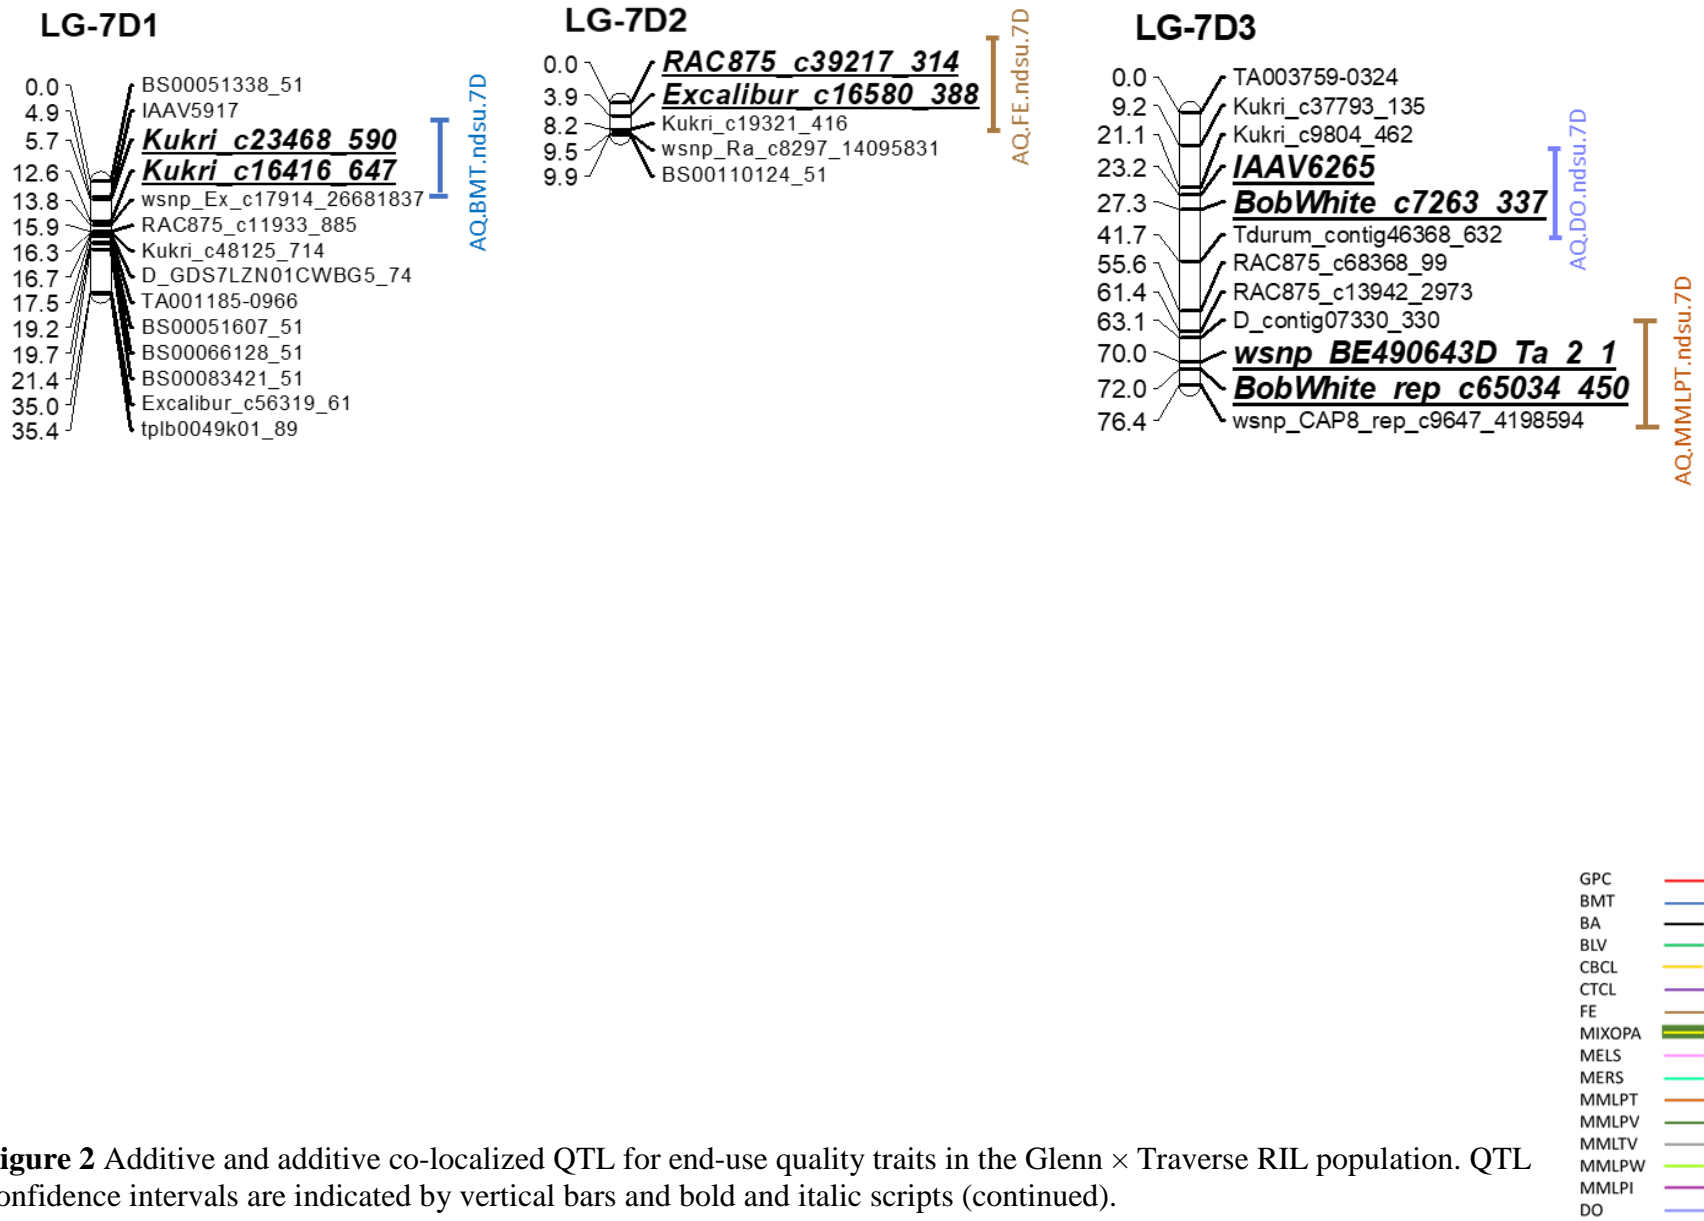

**Figure 2** Additive and additive co-localized QTL for end-use quality traits in the Glenn × Traverse RIL population. QTL confidence intervals are indicated by vertical bars and bold and italic scripts (continued).
